# Supplementary material for: The pretreatment albumin to globulin ratio predicts survival in patients with natural killer/T-cell lymphoma
Source: PeerJ. 2016 Mar 3;4:e1742. doi: 10.7717/peerj.1742 (PMC4782740; doi:10.7717/peerj.1742)
Supplement: Table S1 [file peerj-04-1742-s002.xlsx]

## Sheet: Supplemental table S1
No	Serum Creatinine	AGR1.3	sex	age	elderly	BMI	ECOG	primary site	Annabor stage	B symptoms	LDH status	regional lymph nodes	extranodal sites	IPI	IPI plus AGR	NKPI	NKPI plus AGR	total protein	albumin	AGR	hypoalbumin	WBC	NEUT	ALC	CRP	ESR	treatment	chemotherapy	chemocycles	RTdose	OSmonths	Death	PFSmonths	Progression
1	41.8	<1.3	female	63	>=60	16.0231	>=2	UADT	stage I-II	yes	normal	involved	0-1 site	2-3intermediate risk	2-3	1-2 intermediate risk	1-2 intermediate risk	48.7	21.6	0.794118	0	8.1	7	0.4	17.24		chemo alone	asparaginase-containing reigmens	2		3.35113	Yes	0.887064	yes
2	92.3	<1.3	male	59	<60	24.2215	>=2	EUADT	stage III-IV	yes	elevated	involved	0-1 site	4-5high risk	4-5	3-4 high risk	3-4 AGR<1.3	53.4	23	0.756579	0	5.49	2.55	2.88			chemo alone	asparaginase-containing reigmens	2		9.03491	Yes	3.61396	yes
3	51.1	<1.3	male	34	<60	18.3768	>=2	UADT	stage III-IV	yes	normal	involved	>-2 sites	2-3intermediate risk	2-3	3-4 high risk	3-4 AGR<1.3	50.42	23.6	0.87994	0	4	1.6	1.6	57.34		chemo alone	anthracycline-based regimens	1		4.46817	No	4.46817	yes
4	47	<1.3	male	36	<60	19.5918	>=2	EUADT	stage III-IV	yes	elevated	involved	>-2 sites	4-5high risk	4-5	3-4 high risk	3-4 AGR<1.3	52.6	26.5	1.01533	0	2.9	2.2	0.7		8	chemo alone	asparaginase-containing reigmens	2		3.8768	Yes	2.06982	yes
5	52	>=1.3	male	62	>=60	18.902	>=2	UADT	stage III-IV	yes	elevated	involved	>-2 sites	4-5high risk	4-5	3-4 high risk	3-4 AGR>=1.3	46.1	26.8	1.3886	0	4	2.6	0.9		11	chemo alone	anthracycline-based regimens	1		1.577	Yes	0.558522	yes
6	108	<1.3	male	53	<60	22.4913	0-1	UADT	stage I-II	yes	elevated	uninvolved	0-1 site	0-1low risk	0-1 (AGR<1.3)	1-2 intermediate risk	1-2 intermediate risk	51.43	27.7	1.1673	0	9.06	5.44	2.62	12.62		chemo alone	anthracycline-based regimens	6		15.2115	No	4.3039	yes
7	74	<1.3	male	25	<60	18.0697	>=2	UADT	stage III-IV	yes	elevated	involved	>-2 sites	4-5high risk	4-5	3-4 high risk	3-4 AGR<1.3	51.85	28.4	1.23478	0	4.9	3.27	1.13			chemo alone		4		0.229979	Yes	0.229979	yes
8	58	<1.3	female	59	<60	21.9261	>=2	UADT	stage III-IV	yes	elevated	involved	0-1 site	2-3intermediate risk	2-3	3-4 high risk	3-4 AGR<1.3	53.7	28.4	1.12253	0	7.1	5	1.5	54.8		chemo alone	asparaginase-containing reigmens	3		4.00821	Yes	3.84394	yes
9	94.6	>=1.3	male	61	>=60	19.1001	>=2	UADT	stage I-II	yes	normal	involved	0-1 site	2-3intermediate risk	2-3	1-2 intermediate risk	1-2 intermediate risk	48.3	29.2	1.5288	0	4.1	2.5	1.2	11.93	24	chemo alone	asparaginase-containing reigmens	3		13.2731	No	13.2731	no
10	50.43	<1.3	male	47	<60	21.3675	>=2	EUADT	stage III-IV	yes	elevated	uninvolved	0-1 site	4-5high risk	4-5	3-4 high risk	3-4 AGR<1.3	60.53	29.4	0.945338	0	3	1.8	0.8	5.09	13	RT ± chemo	anthracycline-based regimens	7	54.6	53.9138	No	44.616	yes
11	50.65	<1.3	female	75	>=60	23.4566	>=2	EUADT	stage III-IV	yes	elevated	uninvolved	>-2 sites	4-5high risk	4-5	3-4 high risk	3-4 AGR<1.3	56	30	1.12782	0	3	2.3	0.4	9.79		chemo alone	anthracycline-based regimens	1		1.01848	Yes	0.854209	yes
12	37.26	<1.3	male	45	<60	13.6794	>=2	UADT	stage I-II	yes	normal	involved	0-1 site	0-1low risk	0-1 (AGR<1.3)	1-2 intermediate risk	1-2 intermediate risk	67.28	30.4	0.823848	0	8	5.7	0.9	55.9	17	RT ± chemo	asparaginase-containing reigmens	6	56	64.1971	No	64.1971	no
13	86	<1.3	male	42	<60	19.1327	0-1	UADT	stage I-II	yes	elevated	uninvolved	0-1 site	0-1low risk	0-1 (AGR<1.3)	1-2 intermediate risk	1-2 intermediate risk	60.9	30.8	1.02326	0	3	2.4	0.7			chemo alone	anthracycline-based regimens	2		2.46407	Yes	1.28131	yes
14	57	<1.3	male	54	<60	19.9594	0-1	UADT	stage I-II	no	elevated	uninvolved	0-1 site	0-1low risk	0-1 (AGR<1.3)	1-2 intermediate risk	1-2 intermediate risk	60.7	31	1.04377	0	6.1	4.9	0.6		18	RT ± chemo	anthracycline-based regimens	1	56	4.69815	Yes	2.59548	yes
15	91.74	<1.3	male	38	<60	20.0877	>=2	UADT	stage III-IV	yes	elevated	involved	>-2 sites	4-5high risk	4-5	3-4 high risk	3-4 AGR<1.3	62.33	31.2	1.00322	0	2.7	2.06	0.39	19.87		chemo alone	anthracycline-based regimens	1		0.295688	Yes	0.295688	yes
16	74.73	>=1.3	male	54	<60	18.2531	>=2	UADT	stage I-II	yes	elevated	uninvolved	0-1 site	0-1low risk	0-1 (AGR>=1.3)	1-2 intermediate risk	1-2 intermediate risk	49.88	31.5	1.71196	0	0.9	0.37	0.42	28.05		chemo alone		4		1.34702	Yes	1.34702	yes
17	69.4	<1.3	male	64	>=60	23.3377	0-1	UADT	stage I-II	yes	normal	uninvolved	0-1 site	0-1low risk	0-1 (AGR<1.3)	1-2 intermediate risk	1-2 intermediate risk	66.86	31.5	0.889831	0	4.1	2.7	1.1	58.64		chemo alone	asparaginase-containing reigmens	4		4.40246	Yes	2.92402	yes
18	59.3	>=1.3	male	41	<60	19.3625	0-1	UADT	stage I-II	yes	normal	uninvolved	0-1 site	0-1low risk	0-1 (AGR>=1.3)	1-2 intermediate risk	1-2 intermediate risk	50.95	31.6	1.62887	0	3.8	3.3	0.3	20.64	56	chemo alone	anthracycline-based regimens	1		1.1499	Yes	1.1499	yes
19	51.3	<1.3	male	53	<60	25.3444	0-1	UADT	stage I-II	yes	normal	involved	0-1 site	0-1low risk	0-1 (AGR<1.3)	1-2 intermediate risk	1-2 intermediate risk	57.31	31.7	1.23828	0	6.5	4.7	1.2	10.38		chemo alone		4		0.558522	Yes	0.558522	yes
20	38.9	>=1.3	male	62	>=60	21.2084	>=2	UADT	stage I-II	yes	elevated	involved	0-1 site	2-3intermediate risk	2-3	3-4 high risk	3-4 AGR>=1.3	51.3	31.8	1.63077	0	5.65	4.46	0.79			chemo alone	asparaginase-containing reigmens	1		4.82957	Yes	0.361396	yes
21	104	<1.3	male	76	>=60	21.9363	>=2	UADT	stage III-IV	yes	elevated	involved	>-2 sites	4-5high risk	4-5	3-4 high risk	3-4 AGR<1.3	66.2	31.8	0.924419	0	2.9	1.9	0.7		5	chemo alone	anthracycline-based regimens	1		1.9384	Yes	0.952772	yes
22	72.17	<1.3	male	61	>=60	24.6097	>=2	EUADT	stage I-II	yes	normal	involved	0-1 site	2-3intermediate risk	2-3	1-2 intermediate risk	1-2 intermediate risk	63.6	32.1	1.01905	0	11.5	9.2	1.3	103.41		RT ± chemo	anthracycline-based regimens	8	40	30.9158	Yes	13.9959	yes
23	108	<1.3	male	53	<60	20.8209	0-1	UADT	stage I-II	yes	normal	uninvolved	0-1 site	0-1low risk	0-1 (AGR<1.3)	1-2 intermediate risk	1-2 intermediate risk	67.1	32.2	0.922636	0	8	6	1			RT ± chemo	anthracycline-based regimens	6	56	144.23	No	144.23	no
24	62.77	>=1.3	male	32	<60	16.8962	>=2	EUADT	stage III-IV	yes	elevated	involved	0-1 site	2-3intermediate risk	2-3	3-4 high risk	3-4 AGR>=1.3	57.53	32.5	1.3	0	3.3	2.4	0.75	11.28	5	chemo alone	anthracycline-based regimens	2		4.40246	Yes	0.722793	yes
25	62.9	<1.3	male	28	<60	19.0311	>=2	UADT	stage III-IV	yes	elevated	uninvolved	>-2 sites	4-5high risk	4-5	3-4 high risk	3-4 AGR<1.3	62	32.9	1.13058	0	3.07	2.17	0.77			chemo alone	asparaginase-containing reigmens	2		1.18275	Yes	0.689938	yes
26	67.8	<1.3	male	57	<60	20.4152	0-1	UADT	stage I-II	yes	normal	uninvolved	0-1 site	0-1low risk	0-1 (AGR<1.3)	1-2 intermediate risk	1-2 intermediate risk	70.5	33.2	0.890319	0	5.9	3.92	1.09	24.6	55	chemo alone	anthracycline-based regimens	3		2.62834	Yes	2.3655	yes
27	66.75	<1.3	male	39	<60	18.8189	0-1	UADT	stage I-II	yes	normal	uninvolved	0-1 site	0-1low risk	0-1 (AGR<1.3)	1-2 intermediate risk	1-2 intermediate risk	66.34	33.6	1.02752	0	8	5	2.3	46.91	35	chemo alone	anthracycline-based regimens	2		6.63655	Yes	5.19097	yes
28	44	>=1.3	female	31	<60	20.8889	0-1	UADT	stage I-II	yes	elevated	involved	0-1 site	0-1low risk	0-1 (AGR>=1.3)	3-4 high risk	3-4 AGR>=1.3	56.1	33.7	1.50446	0	2.7	1.7	0.7	2.83		RT ± chemo	anthracycline-based regimens	3	36	3.0883	Yes	3.05544	yes
29	70	>=1.3	female	39	<60	21.3675	>=2	UADT	stage I-II	yes	normal	uninvolved	0-1 site	0-1low risk	0-1 (AGR>=1.3)	1-2 intermediate risk	1-2 intermediate risk	58.8	34.2	1.39024	0	7.5	6	1.1		18	RT ± chemo	anthracycline-based regimens	1	50	2.52977	Yes	2.52977	yes
30	79.9	<1.3	male	57	<60	17.2248	>=2	UADT	stage III-IV	yes	elevated	involved	>-2 sites	4-5high risk	4-5	3-4 high risk	3-4 AGR<1.3	69.42	34.3	0.977208	0	5.6	2.4	3	19.59	8	chemo alone		4		1.67556	Yes	0	yes
31	67.1	<1.3	male	43	<60	22.3214	0-1	UADT	stage I-II	yes	normal	involved	0-1 site	0-1low risk	0-1 (AGR<1.3)	1-2 intermediate risk	1-2 intermediate risk	70.51	34.3	0.947514	0	5.9	3.9	0.9	69.57	89	chemo alone	anthracycline-based regimens	3		27.2361	Yes	27.2361	yes
32	54.5	>=1.3	female	42	<60	21.6311	0-1	UADT	stage I-II	no	normal	uninvolved	0-1 site	0-1low risk	0-1 (AGR>=1.3)	0 low risk	0 low risk	56.26	34.4	1.57365	0	2.8	1.8	0.7	0.83		chemo alone	asparaginase-containing reigmens	4		10.4805	Yes	10.4805	yes
33	80	<1.3	female	48	<60	20.5761	0-1	UADT	stage I-II	yes	elevated	uninvolved	0-1 site	0-1low risk	0-1 (AGR<1.3)	1-2 intermediate risk	1-2 intermediate risk	67.6	34.5	1.0423	0	8.4	6.7	1.5		87	chemo alone	anthracycline-based regimens	3		114.924	No	5.94661	yes
34	82	<1.3	female	34	<60	16.8242	>=2	UADT	stage III-IV	yes	elevated	uninvolved	>-2 sites	4-5high risk	4-5	3-4 high risk	3-4 AGR<1.3	64.4	34.6	1.16107	0	2.8	1.8	0.7			chemo alone	anthracycline-based regimens	1		2.92402	Yes	1.47844	yes
35	59.6	<1.3	male	67	>=60	25.9516	>=2	UADT	stage III-IV	yes	elevated	uninvolved	>-2 sites	4-5high risk	4-5	3-4 high risk	3-4 AGR<1.3	65.67	34.6	1.11613	0	3.6	3	0.4	20.04		chemo alone	asparaginase-containing reigmens	1		1.90554	Yes	1.90554	yes
36	60.6	<1.3	male	48	<60	19.1571	>=2	UADT	stage I-II	yes	elevated	involved	0-1 site	2-3intermediate risk	2-3	3-4 high risk	3-4 AGR<1.3	73.8	34.8	0.892308	0	3.1	2.1	0.6	18.28		chemo alone	asparaginase-containing reigmens	8		8.11499	Yes	4.69815	yes
37	47.16	<1.3	male	36	<60	32.7694	0-1	UADT	stage I-II	yes	normal	involved	0-1 site	0-1low risk	0-1 (AGR<1.3)	1-2 intermediate risk	1-2 intermediate risk	67.3	34.8	1.07077	0	12.8	12	0.7	154.9	90	RT ± chemo	anthracycline-based regimens	6	58	73.1335	No	73.1335	no
38	39.3	<1.3	female	27	<60	18.9866	>=2	EUADT	stage III-IV	yes	elevated	involved	>-2 sites	4-5high risk	4-5	3-4 high risk	3-4 AGR<1.3	61.88	34.9	1.29259	0	1.6	0.6	0.7	0.86		chemo alone	anthracycline-based regimens	5		12.7474	Yes	1.37988	yes
39	78.2	>=1.3	male	14	<60	16.6531	0-1	UADT	stage III-IV	yes	elevated	involved	0-1 site	2-3intermediate risk	2-3	3-4 high risk	3-4 AGR>=1.3	62	35	1.2963	1	6.7	4.4	1.5			chemo alone	asparaginase-containing reigmens	5		34.1027	No	34.1027	no
40	47	<1.3	male	63	>=60	20.4152	>=2	UADT	stage III-IV	yes	elevated	involved	>-2 sites	4-5high risk	4-5	3-4 high risk	3-4 AGR<1.3	68.3	35.1	1.05723	1	1.6	1.2	0.2	15.57		chemo alone	anthracycline-based regimens	1		0.919918	Yes	0.394251	yes
41	65.6	>=1.3	female	59	<60	15.8059	>=2	EUADT	stage III-IV	no	elevated	involved	0-1 site	4-5high risk	4-5	3-4 high risk	3-4 AGR>=1.3	56.82	35.2	1.62963	1	3.3	2.2	1	11.73		chemo alone	anthracycline-based regimens	1		2.13552	Yes	1.1499	yes
42	65	<1.3	male	51	<60	17.8465	0-1	UADT	stage I-II	no	normal	uninvolved	0-1 site	0-1low risk	0-1 (AGR<1.3)	0 low risk	0 low risk	72.3	35.2	0.948787	1	5.7	3.1	1.9			chemo alone	anthracycline-based regimens	4		8.64066	Yes	8.64066	yes
43	57	<1.3	female	47	<60	18.3655	0-1	UADT	stage I-II	yes	elevated	involved	0-1 site	0-1low risk	0-1 (AGR<1.3)	3-4 high risk	3-4 AGR<1.3	68.63	35.3	1.06006	1	4.6	3.04	1.26	36.98		RT ± chemo	asparaginase-containing reigmens	4	52	27.1704	No	27.1704	no
44	74.6	>=1.3	male	72	>=60	19.3625	0-1	UADT	stage I-II	yes	normal	uninvolved	0-1 site	0-1low risk	0-1 (AGR>=1.3)	1-2 intermediate risk	1-2 intermediate risk	61.4	35.5	1.37066	1	4.1	2.7	1	43.9	9	chemo alone	anthracycline-based regimens	2		1.24846	Yes	0.0985626	yes
45	57.2	<1.3	female	45	<60	22.0317	>=2	EUADT	stage III-IV	yes	normal	involved	>-2 sites	2-3intermediate risk	2-3	3-4 high risk	3-4 AGR<1.3	72.06	35.5	0.969945	1	2.5	1.6	0.5	53.88	51	RT ± chemo	anthracycline-based regimens	9	50	47.7372	No	0.328542	yes
46	64.9	<1.3	male	49	<60	25.2493	0-1	UADT	stage I-II	yes	elevated	involved	0-1 site	0-1low risk	0-1 (AGR<1.3)	3-4 high risk	3-4 AGR<1.3	68.67	35.5	1.06928	1	4	3	0.7	33.06	60	RT ± chemo	anthracycline-based regimens	5	56	7.06366	Yes	6.43943	yes
47	73	<1.3	female	77	>=60	17.313	>=2	UADT	stage III-IV	yes	elevated	involved	>-2 sites	4-5high risk	4-5	3-4 high risk	3-4 AGR<1.3	63.8	35.6	1.26241	1	3.15	2	0.74			chemo alone	asparaginase-containing reigmens	1		1.31417	Yes	0.854209	yes
48	89.09	<1.3	male	43	<60	19.563	0-1	UADT	stage I-II	yes	normal	uninvolved	0-1 site	0-1low risk	0-1 (AGR<1.3)	1-2 intermediate risk	1-2 intermediate risk	68.99	35.6	1.06587	1	8.2	5.7	1.2	62.92		RT ± chemo	anthracycline-based regimens	6	46	58.152	No	15.6715	yes
49	69	<1.3	male	40	<60	18.7305	0-1	UADT	stage I-II	yes	elevated	uninvolved	0-1 site	0-1low risk	0-1 (AGR<1.3)	1-2 intermediate risk	1-2 intermediate risk	65.16	35.7	1.21017	1	4.3	3	0.7	25.53	26	chemo alone	anthracycline-based regimens	1		11.5318	Yes	11.5318	yes
50	69.1	<1.3	male	75	>=60	19.1571	>=2	UADT	stage I-II	yes	normal	involved	0-1 site	2-3intermediate risk	2-3	1-2 intermediate risk	1-2 intermediate risk	64.8	35.7	1.2268	1	5.2	4	0.8	64.7	9	chemo alone	asparaginase-containing reigmens	2		3.35113	Yes	3.0883	yes
51	101.7	<1.3	male	65	>=60	22.719	0-1	UADT	stage I-II	yes	normal	uninvolved	0-1 site	0-1low risk	0-1 (AGR<1.3)	1-2 intermediate risk	1-2 intermediate risk	74.55	35.7	0.918919	1	9.39	5.71	2.15	41.52	104	chemo alone	asparaginase-containing reigmens	4		10.5791	Yes	9.59343	yes
52	64.1	<1.3	male	24	<60	19.5312	0-1	UADT	stage I-II	yes	normal	uninvolved	0-1 site	0-1low risk	0-1 (AGR<1.3)	1-2 intermediate risk	1-2 intermediate risk	68.77	35.8	1.08485	1	11.3	9	1.5	19.01		RT ± chemo	anthracycline-based regimens	2	56	7.42505	Yes	4.92813	yes
53	55.9	<1.3	female	65	>=60	20.5761	>=2	EUADT	stage I-II	no	elevated	uninvolved	0-1 site	2-3intermediate risk	2-3	1-2 intermediate risk	1-2 intermediate risk	64.18	35.9	1.26945	1	6.6	4.5	1.2	3.59		RT ± chemo	asparaginase-containing reigmens	4	54.6	19.0554	No	19.0554	no
54	65	>=1.3	male	44	<60	23.03	0-1	UADT	stage I-II	yes	normal	uninvolved	0-1 site	0-1low risk	0-1 (AGR>=1.3)	1-2 intermediate risk	1-2 intermediate risk	63	35.9	1.32472	1	7.32	4.7	1.71			RT ± chemo	asparaginase-containing reigmens	6	56	33.117	No	33.117	no
55	62.8	<1.3	male	41	<60	23.8751	0-1	UADT	stage I-II	yes	normal	uninvolved	0-1 site	0-1low risk	0-1 (AGR<1.3)	1-2 intermediate risk	1-2 intermediate risk	68.8	35.9	1.09119	1	6.4	3	2.8	4.89		RT ± chemo	anthracycline-based regimens	6	60	64.3943	No	64.3943	no
56	88.17	>=1.3	male	19	<60	22.2656	0-1	UADT	stage I-II	no	normal	uninvolved	0-1 site	0-1low risk	0-1 (AGR>=1.3)	0 low risk	0 low risk	60	36	1.5	1	5.24	3.13	1.47			RT ± chemo	asparaginase-containing reigmens	6	50	52.6982	No	52.6982	no
57	80	<1.3	female	37	<60	22.7694	0-1	UADT	stage I-II	no	normal	involved	0-1 site	0-1low risk	0-1 (AGR<1.3)	1-2 intermediate risk	1-2 intermediate risk	79.16	36	0.833333	1	8	6	1.2		78	RT ± chemo	anthracycline-based regimens	6	54	80.6571	No	80.6571	no
58	43.17	>=1.3	female	43	<60	21.9261	0-1	UADT	stage I-II	no	normal	involved	0-1 site	0-1low risk	0-1 (AGR>=1.3)	1-2 intermediate risk	1-2 intermediate risk	62.29	36.2	1.38697	1	6.5	4.1	1.73	2.17	14	chemo alone	anthracycline-based regimens	1		4.79671	Yes	4.79671	yes
59	89.9	<1.3	male	72	>=60	24.6755	>=2	UADT	stage I-II	yes	elevated	involved	0-1 site	2-3intermediate risk	2-3	3-4 high risk	3-4 AGR<1.3	71.8	36.2	1.00556	1	9.5	7.4	1.2	56.65		chemo alone	asparaginase-containing reigmens	1		0.229979	Yes	0.229979	yes
60	76.9	<1.3	male	31	<60	23.03	0-1	EUADT	stage III-IV	no	elevated	involved	0-1 site	2-3intermediate risk	2-3	3-4 high risk	3-4 AGR<1.3	75.64	36.5	0.93255	1	4.61	2.89	1.16	8.03	70	chemo alone	asparaginase-containing reigmens	6		18.6612	No	18.6612	no
61	46.2	>=1.3	female	27	<60	15.8169	0-1	UADT	stage I-II	yes	elevated	involved	0-1 site	0-1low risk	0-1 (AGR>=1.3)	3-4 high risk	3-4 AGR>=1.3	64.32	36.6	1.30714	1	7.5	6.2	0.9	0.42		RT ± chemo	anthracycline-based regimens	6	56	30.1273	No	30.1273	no
62	54	<1.3	female	25	<60	19.0443	0-1	UADT	stage I-II	yes	elevated	uninvolved	0-1 site	0-1low risk	0-1 (AGR<1.3)	1-2 intermediate risk	1-2 intermediate risk	68.6	36.6	1.14375	1	5.1	3.2	1.4	15	60	RT ± chemo	anthracycline-based regimens	6	50	23.5565	Yes	23.5565	yes
63	104	>=1.3	male	48	<60	20.8117	0-1	UADT	stage I-II	no	normal	uninvolved	0-1 site	0-1low risk	0-1 (AGR>=1.3)	0 low risk	0 low risk	59.9	36.6	1.57082	1	4.9	2.5	1.8		2	RT ± chemo	anthracycline-based regimens	6	54	91.729	No	91.729	no
64	67	>=1.3	male	57	<60	23.2434	>=2	UADT	stage III-IV	yes	elevated	uninvolved	>-2 sites	4-5high risk	4-5	1-2 intermediate risk	1-2 intermediate risk	59.3	36.6	1.61233	1	4.2	2.8	0.8	18.18		chemo alone	anthracycline-based regimens	6		8.04928	Yes	4.33676	yes
65	57.54	>=1.3	male	17	<60	16.456	0-1	UADT	stage I-II	yes	elevated	involved	0-1 site	0-1low risk	0-1 (AGR>=1.3)	3-4 high risk	3-4 AGR>=1.3	61.55	36.7	1.4739	1	4.8	2.9	1.3	24.61	14	RT ± chemo	anthracycline-based regimens	4	40	70.3737	No	70.3737	no
66	38.2	<1.3	female	27	<60	17.6898	0-1	UADT	stage I-II	no	normal	uninvolved	0-1 site	0-1low risk	0-1 (AGR<1.3)	0 low risk	0 low risk	70.7	36.7	1.07941	1	4.03	2.57	1.19			RT ± chemo	asparaginase-containing reigmens	5	56.7	32.5585	No	32.5585	no
67	44.88	>=1.3	female	41	<60	20.0877	>=2	EUADT	stage III-IV	yes	elevated	involved	0-1 site	4-5high risk	4-5	3-4 high risk	3-4 AGR>=1.3	62.5	36.7	1.42248	1	8.2	6.97	0.5	87.62		chemo alone	anthracycline-based regimens	2		22.1109	Yes	22.1109	yes
68	74.84	>=1.3	male	44	<60	24.1588	0-1	UADT	stage I-II	no	normal	uninvolved	0-1 site	0-1low risk	0-1 (AGR>=1.3)	0 low risk	0 low risk	64.84	36.7	1.30605	1	6.2	3.5	1.9	2.8	6	RT ± chemo			56	61.2402	No	61.2402	no
69	54.2	<1.3	female	49	<60	26.6728	0-1	UADT	stage I-II	no	normal	uninvolved	0-1 site	0-1low risk	0-1 (AGR<1.3)	0 low risk	0 low risk	78.34	36.7	0.881364	1	13.3	9.9	2.4	15.11	56	RT ± chemo	asparaginase-containing reigmens	3	54.6	19.384	No	19.384	no
70	32.8	<1.3	male	11	<60	17.0898	0-1	EUADT	stage III-IV	yes	normal	involved	0-1 site	0-1low risk	0-1 (AGR<1.3)	3-4 high risk	3-4 AGR<1.3	66.12	36.8	1.25597	1	6.3	4.5	0.8			chemo alone	anthracycline-based regimens	6		12.7146	Yes	10.2505	yes
71	60.7	<1.3	female	25	<60	19.5717	0-1	UADT	stage I-II	yes	normal	uninvolved	0-1 site	0-1low risk	0-1 (AGR<1.3)	1-2 intermediate risk	1-2 intermediate risk	82.28	37.1	0.82116	1	3.9	1.7	1.9	2.64	70	RT ± chemo	asparaginase-containing reigmens	6	55	17.117	No	17.117	no
72	71.71	>=1.3	male	64	>=60	20.9042	0-1	UADT	stage III-IV	no	normal	uninvolved	>-2 sites	2-3intermediate risk	2-3	1-2 intermediate risk	1-2 intermediate risk	61.15	37.1	1.54583	1	5.7	3.4	1.7	8.05		RT ± chemo	anthracycline-based regimens	6	50	15.6057	Yes	15.6057	yes
73	74.6	<1.3	male	48	<60	21.2585	0-1	UADT	stage I-II	yes	elevated	uninvolved	0-1 site	0-1low risk	0-1 (AGR<1.3)	1-2 intermediate risk	1-2 intermediate risk	71.56	37.3	1.09706	1	14	10.8	1.9	130.24	50	RT ± chemo	asparaginase-containing reigmens	2	54.6	28.1561	Yes	26.7762	yes
74	52.3	<1.3	male	21	<60	15.4315	0-1	UADT	stage I-II	yes	elevated	involved	0-1 site	0-1low risk	0-1 (AGR<1.3)	3-4 high risk	3-4 AGR<1.3	69.45	37.4	1.16693	1	6.1	4	1.6	24.25		RT ± chemo	asparaginase-containing reigmens	6	55	18.4641	No	18.4641	no
75	53.3	<1.3	female	20	<60	15.6225	>=2	UADT	stage I-II	yes	elevated	involved	0-1 site	2-3intermediate risk	2-3	3-4 high risk	3-4 AGR<1.3	77.52	37.4	0.932203	1	3.4	2.8	0.4	29.69	45	RT ± chemo	asparaginase-containing reigmens	3	54.6	10.7433	Yes	3.12115	yes
76	70.8	<1.3	male	53	<60	19.7777	>=2	UADT	stage III-IV	yes	elevated	involved	>-2 sites	4-5high risk	4-5	3-4 high risk	3-4 AGR<1.3	67.57	37.4	1.24667	1	7.1	4.5	1.5	19.04		chemo alone	asparaginase-containing reigmens	5		8.34497	Yes	7.88501	yes
77	62	<1.3	male	43	<60	22.0317	0-1	UADT	stage I-II	no	elevated	uninvolved	0-1 site	0-1low risk	0-1 (AGR<1.3)	1-2 intermediate risk	1-2 intermediate risk	67.35	37.4	1.24875	1	7.8	5.37	1.56	51.2	3	RT ± chemo	asparaginase-containing reigmens	5	54.6	26.2834	No	26.2834	no
78	83.6	<1.3	male	64	>=60	44	0-1	UADT	stage I-II	no	normal	uninvolved	0-1 site	0-1low risk	0-1 (AGR<1.3)	0 low risk	0 low risk	66.36	37.5	1.28733	1	4.8	2.5	1.4			RT ± chemo			55	16.5914	No	16.5914	no
79	111	>=1.3	male	80	>=60	24.0882	0-1	UADT	stage I-II	no	normal	uninvolved	0-1 site	0-1low risk	0-1 (AGR>=1.3)	0 low risk	0 low risk	63.6	37.7	1.4556	1	6.3	3.9	1.5			RT ± chemo	anthracycline-based regimens	6	56	100.698	Yes	100.698	no
80	64.26	>=1.3	male	44	<60	19.8413	0-1	UADT	stage III-IV	no	elevated	involved	>-2 sites	2-3intermediate risk	2-3	3-4 high risk	3-4 AGR>=1.3	60.8	37.8	1.64348	1	5.5	3.4	0.73	7.22		chemo alone	anthracycline-based regimens	7		5.71663	Yes	3.8768	yes
81	97	<1.3	male	63	>=60	23.0469	0-1	EUADT	stage III-IV	yes	elevated	involved	0-1 site	2-3intermediate risk	2-3	3-4 high risk	3-4 AGR<1.3	67	37.8	1.29452	1	5.3	3.3	0.9	6.12	12	chemo alone	anthracycline-based regimens	7		6.34086	Yes	1.37988	yes
82	86.3	<1.3	female	58	<60	23.2434	>=2	EUADT	stage III-IV	no	normal	involved	>-2 sites	2-3intermediate risk	2-3	1-2 intermediate risk	1-2 intermediate risk	70.15	37.8	1.16847	1	3.1	2.1	0.5	2.17	17	chemo alone	asparaginase-containing reigmens	5		10.3491	No	10.3491	no
83	97	>=1.3	male	70	>=60	20.8117	0-1	UADT	stage I-II	no	normal	uninvolved	0-1 site	0-1low risk	0-1 (AGR>=1.3)	0 low risk	0 low risk	62.2	37.9	1.55967	1	7.3	4.8	1.7	60.37		RT ± chemo	anthracycline-based regimens	4	50	30.653	Yes	30.653	no
84	78.6	>=1.3	male	58	<60	17.6898	0-1	UADT	stage I-II	no	normal	uninvolved	0-1 site	0-1low risk	0-1 (AGR>=1.3)	0 low risk	0 low risk	66.26	38	1.34276	1	3.6	1.8	1.3			RT ± chemo	asparaginase-containing reigmens	2	50	49.9055	No	49.9055	no
85	51.11	<1.3	male	62	>=60	22.0386	0-1	UADT	stage I-II	no	normal	involved	0-1 site	0-1low risk	0-1 (AGR<1.3)	1-2 intermediate risk	1-2 intermediate risk	72.94	38	1.08883	1	5.7	3.1	1.8	7.11		RT ± chemo	anthracycline-based regimens	1	74	20.6324	Yes	16.5914	yes
86	62.99	<1.3	female	70	>=60	21.2084	0-1	UADT	stage III-IV	no	normal	uninvolved	>-2 sites	2-3intermediate risk	2-3	1-2 intermediate risk	1-2 intermediate risk	82.2	38.1	0.863946	1	6.9	5.7	0.2	43.92	80	RT ± chemo	anthracycline-based regimens	4	50	5.32238	Yes	1.18275	yes
87	43.6	<1.3	female	38	<60	17.9418	0-1	UADT	stage I-II	yes	normal	involved	0-1 site	0-1low risk	0-1 (AGR<1.3)	1-2 intermediate risk	1-2 intermediate risk	72.99	38.3	1.10375	1	4	3	0.8	11.3		RT ± chemo	asparaginase-containing reigmens	7	56	23.2936	No	23.2936	no
88	31.6	>=1.3	female	13	<60	14.8213	0-1	UADT	stage I-II	yes	elevated	uninvolved	0-1 site	0-1low risk	0-1 (AGR>=1.3)	1-2 intermediate risk	1-2 intermediate risk	67.44	38.4	1.32231	1	3.6	2.2	0.94	16.65		RT ± chemo	asparaginase-containing reigmens	4	54.6	22.4066	No	22.4066	no
89	66	>=1.3	male	22	<60	20.4382	0-1	UADT	stage I-II	yes	elevated	uninvolved	0-1 site	0-1low risk	0-1 (AGR>=1.3)	1-2 intermediate risk	1-2 intermediate risk	60.6	38.4	1.72973	1	12.2	9.9	1.7			RT ± chemo	asparaginase-containing reigmens	6		54.1109	No	54.1109	no
90	83.8	>=1.3	male	26	<60	18.0785	0-1	UADT	stage I-II	yes	normal	uninvolved	0-1 site	0-1low risk	0-1 (AGR>=1.3)	1-2 intermediate risk	1-2 intermediate risk	67.51	38.5	1.32759	1	6.1	4.5	1.1	58.14		RT ± chemo	anthracycline-based regimens	3	56	37.7495	No	37.7495	no
91	34	<1.3	female	51	<60	21.7784	>=2	UADT	stage I-II	yes	elevated	involved	0-1 site	2-3intermediate risk	2-3	3-4 high risk	3-4 AGR<1.3	69.1	38.5	1.2623	1	5.4	3	1.5	5.82		chemo alone	anthracycline-based regimens	3		30.1273	Yes	29.306	yes
92	59	>=1.3	female	74	>=60	23.4375	0-1	UADT	stage III-IV	no	elevated	involved	0-1 site	2-3intermediate risk	2-3	3-4 high risk	3-4 AGR>=1.3	67.8	38.5	1.31399	1	4.3	2.6	1.3			RT ± chemo	anthracycline-based regimens	2	60	8.04928	Yes	8.04928	yes
93	48.7	<1.3	male	12	<60	14.8438	0-1	UADT	stage I-II	yes	elevated	involved	0-1 site	0-1low risk	0-1 (AGR<1.3)	3-4 high risk	3-4 AGR<1.3	69.08	38.6	1.26557	1	4.25	2.2	1.6	0.93		RT ± chemo	anthracycline-based regimens	6	46	42.6119	No	42.6119	no
94	55.6	<1.3	female	38	<60	18.7305	0-1	UADT	stage I-II	no	normal	involved	0-1 site	0-1low risk	0-1 (AGR<1.3)	1-2 intermediate risk	1-2 intermediate risk	73.52	38.6	1.10538	1	6.5	3.58	1.81	6.41		RT ± chemo	asparaginase-containing reigmens	4	54.6	14.4559	No	14.4559	no
95	112	>=1.3	male	50	<60	23.9188	0-1	UADT	stage I-II	yes	normal	uninvolved	0-1 site	0-1low risk	0-1 (AGR>=1.3)	1-2 intermediate risk	1-2 intermediate risk	66.8	38.6	1.36879	1	7.9	6.6	1.6		25	RT ± chemo	anthracycline-based regimens	4	50	123.039	No	123.039	no
96	102	>=1.3	male	47	<60	20.0692	0-1	UADT	stage I-II	yes	elevated	uninvolved	0-1 site	0-1low risk	0-1 (AGR>=1.3)	1-2 intermediate risk	1-2 intermediate risk	64.5	38.8	1.50973	1	2.5	0.8	1.5			RT ± chemo	anthracycline-based regimens	4	46	81.2485	No	81.2485	no
97	71.4	<1.3	male	57	<60	21.3039	0-1	UADT	stage III-IV	yes	normal	involved	0-1 site	0-1low risk	0-1 (AGR<1.3)	1-2 intermediate risk	1-2 intermediate risk	69.29	38.8	1.27213	1	15.5	11.9	2.5	60.85		chemo alone	asparaginase-containing reigmens	5		29.3717	No	4.07392	yes
98	57.9	<1.3	male	72	>=60	17.3134	0-1	UADT	stage I-II	yes	normal	uninvolved	0-1 site	0-1low risk	0-1 (AGR<1.3)	1-2 intermediate risk	1-2 intermediate risk	74.65	38.9	1.08056	1	4.2	2	1.4	22.45		RT ± chemo	asparaginase-containing reigmens	2	56	29.6345	No	29.6345	no
99	57.3	>=1.3	male	46	<60	23.03	0-1	UADT	stage I-II	no	normal	uninvolved	0-1 site	0-1low risk	0-1 (AGR>=1.3)	0 low risk	0 low risk	68.03	38.9	1.34138	1	8	5.9	1.6	41.87	20	RT ± chemo	anthracycline-based regimens	4	56	18.7269	No	18.7269	no
100	57	>=1.3	female	56	<60	23.4952	0-1	UADT	stage I-II	no	elevated	uninvolved	0-1 site	0-1low risk	0-1 (AGR>=1.3)	1-2 intermediate risk	1-2 intermediate risk	65.7	38.9	1.45149	1	5.6	3.3	1.7			RT ± chemo	anthracycline-based regimens	4	50	107.828	No	107.828	no
101	61.3	>=1.3	female	59	<60	16.2331	>=2	EUADT	stage III-IV	yes	normal	uninvolved	>-2 sites	2-3intermediate risk	2-3	1-2 intermediate risk	1-2 intermediate risk	66.37	39	1.42336	1	10.9	7.6	2.6	17.42	25	chemo alone	anthracycline-based regimens	1		2.62834	Yes	1.18275	yes
102	56.4	>=1.3	female	28	<60	18.5178	0-1	UADT	stage I-II	no	elevated	uninvolved	0-1 site	0-1low risk	0-1 (AGR>=1.3)	1-2 intermediate risk	1-2 intermediate risk	68.56	39	1.31757	1	8.92	7.2	1.1	0.77	57	RT ± chemo	anthracycline-based regimens	4	54.6	41.8234	No	11.5318	yes
103	74.5	>=1.3	male	57	<60	25.0135	0-1	UADT	stage III-IV	no	elevated	involved	>-2 sites	2-3intermediate risk	2-3	3-4 high risk	3-4 AGR>=1.3	66.39	39	1.44444	1	3.5	2.3	0.7	13.79		chemo alone	asparaginase-containing reigmens	5		25.6263	No	25.6263	no
104	76.6	<1.3	male	59	<60	21.5451	0-1	UADT	stage I-II	no	normal	uninvolved	0-1 site	0-1low risk	0-1 (AGR<1.3)	0 low risk	0 low risk	69.42	39.1	1.28958	1	6.2	3.5	1.7	2.05	17	RT ± chemo	asparaginase-containing reigmens	3	54.6	20.5667	No	20.5667	no
105	56.05	>=1.3	male	16	<60	19.2894	0-1	EUADT	stage III-IV	yes	normal	involved	>-2 sites	2-3intermediate risk	2-3	3-4 high risk	3-4 AGR>=1.3	61.8	39.2	1.73451	1	8.3	6	1.7	1.74	1	RT ± chemo	anthracycline-based regimens	7	50	79.1786	No	15.4415	yes
106	79.24	<1.3	male	50	<60	24.977	0-1	UADT	stage I-II	no	elevated	involved	0-1 site	0-1low risk	0-1 (AGR<1.3)	1-2 intermediate risk	1-2 intermediate risk	73.9	39.2	1.12644	1	3.5	2.4	0.8	13.75		RT ± chemo	anthracycline-based regimens	1	20	0.328542	Yes	0.328542	yes
107	99	<1.3	male	43	<60	23.5294	0-1	UADT	stage I-II	yes	normal	uninvolved	0-1 site	0-1low risk	0-1 (AGR<1.3)	1-2 intermediate risk	1-2 intermediate risk	75.5	39.3	1.08564	1	6.4	4	1.5			chemo alone	anthracycline-based regimens	6		125.175	No	125.175	no
108	58.3	<1.3	male	25	<60	15.8079	0-1	UADT	stage I-II	yes	elevated	involved	0-1 site	0-1low risk	0-1 (AGR<1.3)	3-4 high risk	3-4 AGR<1.3	71.07	39.4	1.24408	1	1.83	1.2	0.3	18.87	44	chemo alone	anthracycline-based regimens	2		3.38398	Yes	2.3655	yes
109	74.23	>=1.3	male	50	<60	17.8565	0-1	UADT	stage I-II	yes	elevated	uninvolved	0-1 site	0-1low risk	0-1 (AGR>=1.3)	1-2 intermediate risk	1-2 intermediate risk	66.17	39.4	1.47015	1	4.5	2.78	1.1			chemo alone	anthracycline-based regimens	5		68.6653	No	68.6653	no
110	60.9	>=1.3	male	18	<60	18.7783	0-1	UADT	stage I-II	no	normal	involved	0-1 site	0-1low risk	0-1 (AGR>=1.3)	1-2 intermediate risk	1-2 intermediate risk	67.3	39.4	1.41219	1	7.2	5	1.3	3.81		RT ± chemo	anthracycline-based regimens	7	50	48.8871	No	13.0431	yes
111	38.05	>=1.3	male	26	<60	18.8189	>=2	EUADT	stage III-IV	no	normal	uninvolved	0-1 site	0-1low risk	0-1 (AGR>=1.3)	0 low risk	0 low risk	59.4	39.4	1.97	1	5.5	2.7	2	7.84		chemo alone	anthracycline-based regimens	6		76.4189	No	76.4189	no
112	68.4	<1.3	female	64	>=60	18.9036	0-1	UADT	stage I-II	yes	normal	uninvolved	0-1 site	0-1low risk	0-1 (AGR<1.3)	1-2 intermediate risk	1-2 intermediate risk	70.13	39.4	1.28213	1	4.5	3.03	1.11	1.98	35	RT ± chemo	asparaginase-containing reigmens	3	54.6	21.848	No	21.848	no
113	87	<1.3	male	40	<60	19.487	>=2	UADT	stage I-II	yes	normal	uninvolved	0-1 site	0-1low risk	0-1 (AGR<1.3)	1-2 intermediate risk	1-2 intermediate risk	75.43	39.5	1.09936	1	3.7	0.9	2.7	2.41		RT ± chemo	asparaginase-containing reigmens	3	50	23.7864	No	23.7864	no
114	78.4	>=1.3	male	59	<60	19.9251	0-1	UADT	stage I-II	yes	normal	involved	0-1 site	0-1low risk	0-1 (AGR>=1.3)	1-2 intermediate risk	1-2 intermediate risk	66.52	39.5	1.46296	1	4.8	2.8	1.3	11.66	18	RT ± chemo	anthracycline-based regimens	4	56	38.768	No	38.768	no
115	55.2	>=1.3	male	27	<60	25.2174	0-1	UADT	stage I-II	no	normal	uninvolved	0-1 site	0-1low risk	0-1 (AGR>=1.3)	0 low risk	0 low risk	68.5	39.5	1.36207	1	11.13	8.65	1.39			RT ± chemo	asparaginase-containing reigmens	6	56	27.3676	No	27.3676	no
116	94.6	<1.3	male	77	>=60	16.937	>=2	EUADT	stage I-II	yes	normal	uninvolved	0-1 site	2-3intermediate risk	2-3	1-2 intermediate risk	1-2 intermediate risk	73.78	39.6	1.16471	1	5.4	3.5	1.1	29.63	29	chemo alone	asparaginase-containing reigmens	2		31.3758	No	29.6674	yes
117	57	<1.3	female	32	<60	17.3333	0-1	UADT	stage I-II	yes	normal	uninvolved	0-1 site	0-1low risk	0-1 (AGR<1.3)	1-2 intermediate risk	1-2 intermediate risk	80.11	39.6	0.977778	1	5.2	3.6	1.2	11.84		RT ± chemo	asparaginase-containing reigmens	6	56	24.4107	No	24.4107	no
118	58.3	<1.3	female	37	<60	18.902	0-1	UADT	stage I-II	yes	normal	involved	0-1 site	0-1low risk	0-1 (AGR<1.3)	1-2 intermediate risk	1-2 intermediate risk	76.54	39.6	1.07027	1	6.2	2.9	2.8	12.16		RT ± chemo	asparaginase-containing reigmens	6	46	24.4764	No	24.4764	no
119	60.81	>=1.3	male	33	<60	19.0311	0-1	UADT	stage I-II	yes	normal	uninvolved	0-1 site	0-1low risk	0-1 (AGR>=1.3)	1-2 intermediate risk	1-2 intermediate risk	65.35	39.6	1.53488	1	9.3	6.7	1.6			RT ± chemo	anthracycline-based regimens	2	56	48.4928	No	48.4928	no
120	74.9	<1.3	male	51	<60	22.4813	0-1	UADT	stage I-II	yes	normal	uninvolved	0-1 site	0-1low risk	0-1 (AGR<1.3)	1-2 intermediate risk	1-2 intermediate risk	76.52	39.6	1.07259	1	7.8	4.5	2.1	69.32	60	RT ± chemo	asparaginase-containing reigmens	6	56	7.35934	No	7.35934	no
121	65.2	<1.3	male	35	<60	30.3673	0-1	UADT	stage I-II	no	normal	involved	0-1 site	0-1low risk	0-1 (AGR<1.3)	1-2 intermediate risk	1-2 intermediate risk	76.74	39.7	1.07181	1	3.9	2	1.4	9.33		RT ± chemo	asparaginase-containing reigmens	3	54.6	15.54	No	15.54	no
122	50.1	>=1.3	male	35	<60	17.1468	0-1	UADT	stage I-II	yes	normal	uninvolved	0-1 site	0-1low risk	0-1 (AGR>=1.3)	1-2 intermediate risk	1-2 intermediate risk	68.48	39.8	1.38773	1	12.9	10.45	1.65	33.33	60	RT ± chemo	asparaginase-containing reigmens	4	54.6	16.1643	No	16.1643	no
123	40	<1.3	female	44	<60	18.7652	0-1	UADT	stage I-II	yes	elevated	involved	0-1 site	0-1low risk	0-1 (AGR<1.3)	3-4 high risk	3-4 AGR<1.3	75.7	39.8	1.10864	1	2.7	1.9	0.3		22	RT ± chemo	anthracycline-based regimens	5	60	5.91376	Yes	5.78234	yes
124	61.9	<1.3	male	53	<60	19.0311	>=2	EUADT	stage I-II	yes	normal	uninvolved	0-1 site	0-1low risk	0-1 (AGR<1.3)	1-2 intermediate risk	1-2 intermediate risk	72.94	39.8	1.20242	1	5	2.3	2.2	2.8		chemo alone	anthracycline-based regimens	4		37.2238	No	37.2238	no
125	84.82	<1.3	male	39	<60	23.4509	0-1	UADT	stage I-II	no	elevated	uninvolved	0-1 site	0-1low risk	0-1 (AGR<1.3)	1-2 intermediate risk	1-2 intermediate risk	78.1	39.8	1.03916	1	4.9	1.9	2.5	6.27	38	chemo alone	anthracycline-based regimens	2		4.96099	Yes	1.44559	yes
126	58	>=1.3	male	35	<60	16.5289	0-1	UADT	stage I-II	yes	normal	involved	0-1 site	0-1low risk	0-1 (AGR>=1.3)	1-2 intermediate risk	1-2 intermediate risk	59.7	39.9	2.01515	1	5.5	3	1.4			RT ± chemo			64	82.8912	No	82.8912	no
127	56.87	<1.3	female	38	<60	18.9745	0-1	UADT	stage I-II	yes	normal	uninvolved	0-1 site	0-1low risk	0-1 (AGR<1.3)	1-2 intermediate risk	1-2 intermediate risk	74.1	39.9	1.16667	1	7.9	5.8	1.5	6.63	48	RT ± chemo	anthracycline-based regimens	3	56	48.9199	No	48.9199	no
128	60.8	>=1.3	male	28	<60	21.1927	0-1	EUADT	stage III-IV	no	elevated	involved	>-2 sites	2-3intermediate risk	2-3	3-4 high risk	3-4 AGR>=1.3	69.83	40	1.33333	1	11.18	9.24	1.17	25.99		RT ± chemo	asparaginase-containing reigmens	5	54.6	24.7392	Yes	19.2854	yes
129	67	>=1.3	male	35	<60	22.0386	0-1	UADT	stage I-II	yes	normal	uninvolved	0-1 site	0-1low risk	0-1 (AGR>=1.3)	1-2 intermediate risk	1-2 intermediate risk	70.16	40	1.3245	1	6.6	3.6	2.1	17.73		RT ± chemo	anthracycline-based regimens	4	54.6	34.7926	No	34.7926	no
130	68.5	<1.3	male	63	>=60	22.2291	0-1	UADT	stage I-II	yes	normal	uninvolved	0-1 site	0-1low risk	0-1 (AGR<1.3)	1-2 intermediate risk	1-2 intermediate risk	82.23	40	0.947867	1	8.3	4.8	2.6	21.54		RT ± chemo	anthracycline-based regimens	6	54	13.5359	Yes	6.2423	yes
131	71	>=1.3	female	38	<60	22.9421	0-1	UADT	stage I-II	yes	elevated	uninvolved	0-1 site	0-1low risk	0-1 (AGR>=1.3)	1-2 intermediate risk	1-2 intermediate risk	67.9	40	1.43369	1	7	4.8	1.5			RT ± chemo	anthracycline-based regimens	6	36	127.179	No	127.179	no
132	53.6	>=1.3	female	49	<60	19.2894	0-1	UADT	stage I-II	no	normal	uninvolved	0-1 site	0-1low risk	0-1 (AGR>=1.3)	0 low risk	0 low risk	67.87	40.1	1.444	1	2.5	1.3	0.9	2.01		chemo alone	asparaginase-containing reigmens	2		11.8275	No	11.8275	no
133	64.6	>=1.3	male	57	<60	24.5675	0-1	UADT	stage I-II	no	normal	uninvolved	0-1 site	0-1low risk	0-1 (AGR>=1.3)	0 low risk	0 low risk	67.13	40.1	1.48519	1	10.3	5.6	3.6	3.91		RT ± chemo	asparaginase-containing reigmens	4	54.6	34.7269	No	34.7269	no
134	100	>=1.3	female	65	>=60	20.9321	0-1	UADT	stage I-II	no	normal	uninvolved	0-1 site	0-1low risk	0-1 (AGR>=1.3)	0 low risk	0 low risk	67.3	40.2	1.48339	1	2.8	1.6	0.9		110	RT ± chemo	anthracycline-based regimens	6	18	45.4702	Yes	37.9795	yes
135	46	<1.3	female	70	>=60	20.8247	0-1	UADT	stage I-II	no	normal	uninvolved	0-1 site	0-1low risk	0-1 (AGR<1.3)	0 low risk	0 low risk	74.1	40.3	1.19231	1	5.8	4.8	0.6		45	RT ± chemo	anthracycline-based regimens	3	50	23.3593	Yes	11.3676	yes
136	59.4	>=1.3	male	60	>=60	21.5451	0-1	UADT	stage I-II	yes	normal	uninvolved	0-1 site	0-1low risk	0-1 (AGR>=1.3)	1-2 intermediate risk	1-2 intermediate risk	64.58	40.3	1.65844	1	5	2.9	1.3	6.7		RT ± chemo	asparaginase-containing reigmens	3	54	22.3409	No	22.3409	no
137	66	<1.3	female	68	>=60	23.7253	0-1	UADT	stage I-II	yes	normal	uninvolved	0-1 site	0-1low risk	0-1 (AGR<1.3)	1-2 intermediate risk	1-2 intermediate risk	72.2	40.3	1.25937	1	6.2	3.1	2.2	1.37	25	RT ± chemo	anthracycline-based regimens	2	56	13.3717	Yes	10.7105	yes
138	33.1	<1.3	female	19	<60	17.3745	0-1	UADT	stage I-II	yes	normal	uninvolved	0-1 site	0-1low risk	0-1 (AGR<1.3)	1-2 intermediate risk	1-2 intermediate risk	71.87	40.4	1.28376	1	4.5	2.8	1.2	5.49		RT ± chemo	anthracycline-based regimens	6	54.6	12.9446	No	9.16632	yes
139	94	>=1.3	male	65	>=60	20.9366	0-1	UADT	stage I-II	no	normal	uninvolved	0-1 site	0-1low risk	0-1 (AGR>=1.3)	0 low risk	0 low risk	64.6	40.4	1.66942	1	8.02	5.53	1.92	3.5		RT ± chemo	anthracycline-based regimens	2	56	26.1191	No	21.5195	yes
140	66.4	>=1.3	male	19	<60	16.563	0-1	UADT	stage I-II	yes	elevated	uninvolved	0-1 site	0-1low risk	0-1 (AGR>=1.3)	1-2 intermediate risk	1-2 intermediate risk	65.7	40.5	1.62	1	2	1.1	0.5	6.91	15	RT ± chemo	asparaginase-containing reigmens	3	54.6	29.5031	No	29.5031	no
141	65.9	<1.3	male	58	<60	22.3214	0-1	UADT	stage I-II	no	elevated	uninvolved	0-1 site	0-1low risk	0-1 (AGR<1.3)	1-2 intermediate risk	1-2 intermediate risk	80.92	40.5	1.00198	1	3.2	1.5	1.4	2.99		RT ± chemo	asparaginase-containing reigmens	4	45	14.5216	No	14.5216	no
142	41.8	<1.3	female	29	<60	17.2248	>=2	EUADT	stage III-IV	yes	elevated	involved	>-2 sites	2-3intermediate risk	2-3	3-4 high risk	3-4 AGR<1.3	73.64	40.6	1.22881	1	4.2	2.58	1.25	8.87		RT ± chemo	anthracycline-based regimens	6	56	18.2012	No	18.2012	no
143	76.61	>=1.3	male	31	<60	20.3244	0-1	UADT	stage I-II	no	normal	involved	0-1 site	0-1low risk	0-1 (AGR>=1.3)	1-2 intermediate risk	1-2 intermediate risk	71.5	40.6	1.31392	1	5.7	3.5	1.4	16.04		chemo alone	anthracycline-based regimens	6		5.8809	Yes	3.90965	yes
144	40	<1.3	female	52	<60	21.2585	0-1	UADT	stage I-II	yes	normal	uninvolved	0-1 site	0-1low risk	0-1 (AGR<1.3)	1-2 intermediate risk	1-2 intermediate risk	72.4	40.6	1.27673	1	3.63	2.31	1.12			RT ± chemo	asparaginase-containing reigmens	4	54.6	50.1355	No	50.1355	no
145	58.41	>=1.3	female	30	<60	21.7994	0-1	UADT	stage I-II	no	normal	uninvolved	0-1 site	0-1low risk	0-1 (AGR>=1.3)	0 low risk	0 low risk	62.46	40.6	1.85388	1	3.7	2.2	1.1	0.66	8	RT ± chemo	anthracycline-based regimens	6	60	26.4805	Yes	11.5647	yes
146	76.4	<1.3	male	53	<60	25.6369	0-1	UADT	stage I-II	no	normal	involved	0-1 site	0-1low risk	0-1 (AGR<1.3)	1-2 intermediate risk	1-2 intermediate risk	76.94	40.6	1.11723	1	10.1	4.5	4.5	30.77		RT ± chemo	asparaginase-containing reigmens	4	58	14.7187	No	13.963	yes
147	67.3	>=1.3	male	55	<60	18.2183	0-1	UADT	stage I-II	yes	normal	involved	0-1 site	0-1low risk	0-1 (AGR>=1.3)	1-2 intermediate risk	1-2 intermediate risk	67.74	40.7	1.50741	1	4.8	3.6	0.6	26.32	41	RT ± chemo	asparaginase-containing reigmens	4	56	32.8214	No	32.8214	no
148	56.3	>=1.3	male	62	>=60	24.2215	0-1	UADT	stage III-IV	no	normal	involved	0-1 site	2-3intermediate risk	2-3	1-2 intermediate risk	1-2 intermediate risk	69.88	40.7	1.39384	1	7.1	4.3	2.3	2.18		RT ± chemo	asparaginase-containing reigmens	6	50	26.3819	No	26.3819	no
149	64.3	>=1.3	male	38	<60	21.4844	0-1	UADT	stage I-II	no	normal	involved	0-1 site	0-1low risk	0-1 (AGR>=1.3)	1-2 intermediate risk	1-2 intermediate risk	68.62	40.8	1.46657	1	9.3	5.8	1.8	11.77		RT ± chemo	asparaginase-containing reigmens	3	50	5.02669	Yes	3.97536	yes
150	65.3	<1.3	female	24	<60	18.7783	0-1	UADT	stage I-II	yes	normal	involved	0-1 site	0-1low risk	0-1 (AGR<1.3)	1-2 intermediate risk	1-2 intermediate risk	72.5	40.9	1.2943	1	7.59	5.1	1.73			RT ± chemo	asparaginase-containing reigmens	6	46	43.269	No	43.269	no
151	63.22	<1.3	male	60	>=60	23.7387	0-1	UADT	stage I-II	yes	normal	involved	0-1 site	0-1low risk	0-1 (AGR<1.3)	1-2 intermediate risk	1-2 intermediate risk	77.35	40.9	1.12055	1	14.8	10.7	2.5	12.81		chemo alone	anthracycline-based regimens	2		10.7105	No	10.7105	no
152	69.44	>=1.3	male	39	<60	24.3911	0-1	UADT	stage I-II	no	normal	uninvolved	0-1 site	0-1low risk	0-1 (AGR>=1.3)	0 low risk	0 low risk	62.9	40.9	1.85909	1	4.2	2.52	1.2	5.62	12	RT ± chemo	anthracycline-based regimens	6	50	74.4805	No	74.4805	no
153	97.12	>=1.3	male	69	>=60	16.5289	0-1	UADT	stage I-II	no	normal	uninvolved	0-1 site	0-1low risk	0-1 (AGR>=1.3)	0 low risk	0 low risk	71.8	41.1	1.33876	1	6.4	3.8	1.7	3.1		RT ± chemo	asparaginase-containing reigmens	3	50	61.8645	No	61.8645	no
154	53.7	>=1.3	female	47	<60	22.7615	0-1	UADT	stage I-II	no	normal	uninvolved	0-1 site	0-1low risk	0-1 (AGR>=1.3)	0 low risk	0 low risk	67.12	41.1	1.58077	1	6.2	3.5	1.7	11.88	51	RT ± chemo	asparaginase-containing reigmens	2	54.6	31.7043	No	31.7043	no
155	89.8	>=1.3	male	79	>=60	22.7694	0-1	UADT	stage I-II	no	normal	uninvolved	0-1 site	0-1low risk	0-1 (AGR>=1.3)	0 low risk	0 low risk	68.74	41.1	1.48698	1	5.8	4.1	1.2	0.54		RT ± chemo			60	17.7741	No	17.7741	no
156	94	>=1.3	male	68	>=60	27.2173	0-1	UADT	stage III-IV	no	normal	uninvolved	>-2 sites	2-3intermediate risk	2-3	1-2 intermediate risk	1-2 intermediate risk	63.1	41.1	1.86818	1	9.7	7.3	1.6			chemo alone	anthracycline-based regimens	3		18.4641	Yes	18.4641	yes
157	76.6	<1.3	female	42	<60	21.58	0-1	UADT	stage I-II	yes	normal	uninvolved	0-1 site	0-1low risk	0-1 (AGR<1.3)	1-2 intermediate risk	1-2 intermediate risk	74.6	41.2	1.23353	1	5.1	3	1.6	1.31		RT ± chemo	asparaginase-containing reigmens	2	54	40.5092	No	40.5092	no
158	87.44	<1.3	male	45	<60	22.3081	0-1	UADT	stage I-II	yes	normal	involved	0-1 site	0-1low risk	0-1 (AGR<1.3)	1-2 intermediate risk	1-2 intermediate risk	78.05	41.2	1.11957	1	5.2	2.55	1.91	1.41	20	RT ± chemo	anthracycline-based regimens	1	60	5.78234	Yes	5.78234	yes
159	60.73	>=1.3	male	47	<60	24.623	0-1	UADT	stage I-II	no	normal	uninvolved	0-1 site	0-1low risk	0-1 (AGR>=1.3)	0 low risk	0 low risk	68.07	41.2	1.5316	1	4.6	3.07	1.06	2.44	6	RT ± chemo	asparaginase-containing reigmens	4	46	65.5441	No	17.4784	yes
160	88	<1.3	male	62	>=60	27.5802	0-1	UADT	stage I-II	no	normal	uninvolved	0-1 site	0-1low risk	0-1 (AGR<1.3)	0 low risk	0 low risk	73.7	41.2	1.26769	1	7.2	4.1	1.5			chemo alone	anthracycline-based regimens	6		17.9055	Yes	16.9199	yes
161	84.4	>=1.3	male	30	<60	23.2254	0-1	EUADT	stage I-II	no	normal	uninvolved	0-1 site	0-1low risk	0-1 (AGR>=1.3)	0 low risk	0 low risk	65.05	41.3	1.73895	1	5.96	3.31	1.97	0.39		chemo alone	asparaginase-containing reigmens	5		11.7618	No	11.7618	no
162	62.2	>=1.3	female	61	>=60	19.5556	0-1	UADT	stage I-II	no	normal	uninvolved	0-1 site	0-1low risk	0-1 (AGR>=1.3)	0 low risk	0 low risk	41.5	41.5	1.41156	1	4.61	2.57	1.53	1.12		RT ± chemo	asparaginase-containing reigmens	1	54.6	24.4764	No	24.4764	no
163	54.4	<1.3	female	32	<60	19.5717	0-1	UADT	stage I-II	yes	normal	involved	0-1 site	0-1low risk	0-1 (AGR<1.3)	1-2 intermediate risk	1-2 intermediate risk	77.15	41.5	1.15278	1	8.1	5	2.6	3.91		RT ± chemo	asparaginase-containing reigmens	4	54.6	30.653	No	30.653	no
164	68.59	>=1.3	male	36	<60	21.4533	0-1	UADT	stage I-II	yes	normal	uninvolved	0-1 site	0-1low risk	0-1 (AGR>=1.3)	1-2 intermediate risk	1-2 intermediate risk	73.53	41.5	1.29688	1	8.4	5.6	1.7	14.61		RT ± chemo	asparaginase-containing reigmens	4	56	63.2115	No	63.2115	no
165	78	>=1.3	male	39	<60	24.093	0-1	UADT	stage I-II	no	normal	uninvolved	0-1 site	0-1low risk	0-1 (AGR>=1.3)	0 low risk	0 low risk	72.1	41.5	1.35621	1	23	20.1	1.1			RT ± chemo	anthracycline-based regimens	6	50	91.8604	Yes	32.8542	yes
166	51.2	<1.3	female	46	<60	26.0375	0-1	UADT	stage I-II	no	normal	uninvolved	0-1 site	0-1low risk	0-1 (AGR<1.3)	0 low risk	0 low risk	77.5	41.5	1.15182	1	5.5	3.05	1.72	7.95	23	RT ± chemo	anthracycline-based regimens	6	50	23.6879	No	23.6879	no
167	71.6	>=1.3	male	31	<60	20.5499	0-1	UADT	stage I-II	no	normal	uninvolved	0-1 site	0-1low risk	0-1 (AGR>=1.3)	0 low risk	0 low risk	62.9	41.6	1.95305	1	6.19	3.47	2.06	0.48		chemo alone	asparaginase-containing reigmens	3		14.7187	No	14.7187	no
168	64.9	>=1.3	male	39	<60	21.3578	0-1	UADT	stage I-II	yes	normal	uninvolved	0-1 site	0-1low risk	0-1 (AGR>=1.3)	1-2 intermediate risk	1-2 intermediate risk	72.1	41.6	1.36393	1	6	3.86	1.6	14.7		RT ± chemo	anthracycline-based regimens	8	60	9.85626	Yes	9.13347	yes
169	67.8	>=1.3	male	49	<60	23.4375	0-1	EUADT	stage III-IV	yes	normal	involved	>-2 sites	2-3intermediate risk	2-3	3-4 high risk	3-4 AGR>=1.3	67.2	41.6	1.625	1	9.3	5.7	3	18.26		chemo alone	asparaginase-containing reigmens	6		20.0411	No	20.0411	no
170	71.2	>=1.3	male	50	<60	25.4694	0-1	UADT	stage I-II	no	normal	involved	0-1 site	0-1low risk	0-1 (AGR>=1.3)	1-2 intermediate risk	1-2 intermediate risk	71.93	41.6	1.37158	1	7.3	4	2.8	29.17	50	RT ± chemo	asparaginase-containing reigmens	3	54.6	11.0719	No	11.0719	no
171	38	>=1.3	female	55	<60	44	0-1	UADT	stage I-II	no	elevated	involved	0-1 site	0-1low risk	0-1 (AGR>=1.3)	1-2 intermediate risk	1-2 intermediate risk	68.2	41.6	1.56391	1	2.8	2	0.6		5	RT ± chemo	anthracycline-based regimens	3	56	104.082	No	5.61807	yes
172	56.4	<1.3	male	30	<60	16.7062	>=2	EUADT	stage III-IV	yes	elevated	involved	0-1 site	4-5high risk	4-5	3-4 high risk	3-4 AGR<1.3	76.4	41.8	1.19429	1	8	4.4	2.6	3.08	22	RT ± chemo	asparaginase-containing reigmens	7	50	10.5791	Yes	5.94661	yes
173	56.4	>=1.3	female	20	<60	19.0677	0-1	UADT	stage I-II	no	elevated	involved	0-1 site	0-1low risk	0-1 (AGR>=1.3)	1-2 intermediate risk	1-2 intermediate risk	71.66	41.8	1.39987	1	5.5	3.8	1.2	10.63	31	RT ± chemo	asparaginase-containing reigmens	6	56	20.0411	No	20.0411	no
174	68.9	<1.3	male	25	<60	22.8374	0-1	UADT	stage I-II	yes	elevated	uninvolved	0-1 site	0-1low risk	0-1 (AGR<1.3)	1-2 intermediate risk	1-2 intermediate risk	81.49	41.8	1.045	1	11.3	8	2.3	54.68		RT ± chemo	asparaginase-containing reigmens	3	54.6	25.3634	No	25.3634	no
175	53	>=1.3	female	41	<60	29.865	0-1	UADT	stage III-IV	no	elevated	uninvolved	>-2 sites	2-3intermediate risk	2-3	1-2 intermediate risk	1-2 intermediate risk	69.56	41.8	1.5036	1	4.3	2.2	1.5	24.11		chemo alone	anthracycline-based regimens	1		10.1848	Yes	8.1807	yes
176	53.2	>=1.3	female	50	<60	18.6115	0-1	UADT	stage I-II	no	normal	uninvolved	0-1 site	0-1low risk	0-1 (AGR>=1.3)	0 low risk	0 low risk	72.99	41.9	1.34727	1	9	6.2	2.1	6.98		RT ± chemo	anthracycline-based regimens	4	56	36.3039	No	36.3039	no
177	87.5	>=1.3	male	46	<60	25.9516	0-1	UADT	stage III-IV	yes	elevated	involved	>-2 sites	2-3intermediate risk	2-3	3-4 high risk	3-4 AGR>=1.3	67.72	41.9	1.62403	1	5.2	3.7	0.9	9.85		chemo alone	anthracycline-based regimens	10		21.5195	No	8.1807	yes
178	38	<1.3	female	38	<60	17.3333	0-1	UADT	stage I-II	no	normal	uninvolved	0-1 site	0-1low risk	0-1 (AGR<1.3)	0 low risk	0 low risk	77.6	42	1.17978	1	6.7	4.5	1.5	7.67	55	RT ± chemo	asparaginase-containing reigmens	6	56.6	18.8255	No	18.8255	no
179	84	>=1.3	female	30	<60	19.2894	0-1	UADT	stage I-II	no	normal	uninvolved	0-1 site	0-1low risk	0-1 (AGR>=1.3)	0 low risk	0 low risk	73.7	42.1	1.33228	1	8.2	5.5	1.8			RT ± chemo	anthracycline-based regimens	6	54	139.006	No	139.006	no
180	54.6	<1.3	female	52	<60	19.9762	0-1	UADT	stage I-II	no	normal	involved	0-1 site	0-1low risk	0-1 (AGR<1.3)	1-2 intermediate risk	1-2 intermediate risk	75.43	42.1	1.26426	1	5.1	2.9	1.8	1.59		chemo alone	asparaginase-containing reigmens	3		42.1191	No	42.1191	no
181	95.8	>=1.3	male	75	>=60	20.9644	0-1	UADT	stage I-II	no	normal	uninvolved	0-1 site	0-1low risk	0-1 (AGR>=1.3)	0 low risk	0 low risk	73.9	42.1	1.3239	1	7.1	4.9	1.7	11.24		RT ± chemo	asparaginase-containing reigmens	2	54.6	14.3244	No	14.3244	no
182	82.59	<1.3	male	44	<60	23.3067	0-1	UADT	stage I-II	yes	elevated	uninvolved	0-1 site	0-1low risk	0-1 (AGR<1.3)	1-2 intermediate risk	1-2 intermediate risk	76.75	42.1	1.21326	1	6.2	3.65	2.55			RT ± chemo	anthracycline-based regimens	3	56	31.5072	No	31.5072	no
183	59.8	>=1.3	female	41	<60	24.1672	0-1	UADT	stage I-II	yes	elevated	involved	0-1 site	0-1low risk	0-1 (AGR>=1.3)	3-4 high risk	3-4 AGR>=1.3	72.8	42.2	1.37908	1	5.2	2.9	2	15.51	16	chemo alone	anthracycline-based regimens	6		39.6879	No	39.6879	no
184	93	>=1.3	male	58	<60	24.6094	0-1	UADT	stage I-II	no	normal	uninvolved	0-1 site	0-1low risk	0-1 (AGR>=1.3)	0 low risk	0 low risk	69.8	42.2	1.52899	1	6.7	3.7	1.9		17	RT ± chemo			60	24.8378	Yes	21.848	yes
185	63.49	<1.3	male	17	<60	17.7154	0-1	UADT	stage I-II	yes	normal	uninvolved	0-1 site	0-1low risk	0-1 (AGR<1.3)	1-2 intermediate risk	1-2 intermediate risk	75.47	42.3	1.2741	1	15.6	12.9	2.6			RT ± chemo	anthracycline-based regimens	2	56	47.9343	No	47.9343	no
186	50.46	>=1.3	female	30	<60	18.8271	0-1	UADT	stage I-II	no	normal	involved	0-1 site	0-1low risk	0-1 (AGR>=1.3)	1-2 intermediate risk	1-2 intermediate risk	64.98	42.3	1.86344	1	7.6	5.6	1	5.52		chemo alone	asparaginase-containing reigmens	6		5.84805	Yes	3.90965	yes
187	75.2	>=1.3	male	38	<60	20.5499	0-1	UADT	stage I-II	no	normal	uninvolved	0-1 site	0-1low risk	0-1 (AGR>=1.3)	0 low risk	0 low risk	68.64	42.3	1.60592	1	6.19	3.47	2.06	0.99		RT ± chemo	asparaginase-containing reigmens	3	46	10.7105	No	10.7105	no
188	75.3	>=1.3	male	48	<60	20.7612	0-1	UADT	stage I-II	no	normal	uninvolved	0-1 site	0-1low risk	0-1 (AGR>=1.3)	0 low risk	0 low risk	70.29	42.3	1.51125	1	6	3.5	1.9	3.97	23	RT ± chemo	anthracycline-based regimens	3	54.6	11.4661	Yes	11.4661	yes
189	78.77	>=1.3	male	32	<60	21.7993	>=2	EUADT	stage III-IV	yes	elevated	uninvolved	>-2 sites	4-5high risk	4-5	3-4 high risk	3-4 AGR>=1.3	64.6	42.3	1.89686	1	1.3	0.73	0.3	17.45	14	chemo alone	anthracycline-based regimens	1		26.152	Yes	26.152	yes
190	108	>=1.3	male	61	>=60	21.0498	0-1	UADT	stage I-II	yes	normal	uninvolved	0-1 site	0-1low risk	0-1 (AGR>=1.3)	1-2 intermediate risk	1-2 intermediate risk	72.4	42.4	1.41333	1	7.2	5.6	0.7			RT ± chemo	anthracycline-based regimens	6	56	20.3696	Yes	20.3696	no
191	71.5	>=1.3	male	20	<60	16.5289	0-1	UADT	stage III-IV	yes	elevated	involved	>-2 sites	2-3intermediate risk	2-3	3-4 high risk	3-4 AGR>=1.3	71.9	42.5	1.44558	1	3.9	1.78	1.48	2.41	4	chemo alone	asparaginase-containing reigmens	8		13.7988	Yes	9.10062	yes
192	64.78	<1.3	male	22	<60	19.433	0-1	UADT	stage I-II	yes	elevated	uninvolved	0-1 site	0-1low risk	0-1 (AGR<1.3)	1-2 intermediate risk	1-2 intermediate risk	76.26	42.5	1.2574	1	6.2	3.21	2.44	7.07	7	chemo alone	anthracycline-based regimens	6		23.6222	Yes	20.9281	yes
193	77	>=1.3	male	41	<60	22.5466	0-1	EUADT	stage III-IV	yes	normal	uninvolved	>-2 sites	2-3intermediate risk	2-3	1-2 intermediate risk	1-2 intermediate risk	67	42.5	1.73469	1	5.5	3.5	1			chemo alone	anthracycline-based regimens	1		4.69815	Yes	0.0985626	yes
194	54.1	<1.3	male	26	<60	19.8413	0-1	UADT	stage I-II	no	normal	involved	0-1 site	0-1low risk	0-1 (AGR<1.3)	1-2 intermediate risk	1-2 intermediate risk	77.09	42.6	1.23514	1	7.4	5.6	1.1	4.69		RT ± chemo	asparaginase-containing reigmens	5	54.6	14.9158	No	14.9158	no
195	79.93	>=1.3	male	41	<60	21.7181	0-1	UADT	stage I-II	yes	elevated	uninvolved	0-1 site	0-1low risk	0-1 (AGR>=1.3)	1-2 intermediate risk	1-2 intermediate risk	71.24	42.6	1.48951	1	3.3	2.3	0.5	34.86		chemo alone	anthracycline-based regimens	6		5.8152	Yes	3.8768	yes
196	88	>=1.3	female	37	<60	22.4082	0-1	UADT	stage I-II	no	normal	uninvolved	0-1 site	0-1low risk	0-1 (AGR>=1.3)	0 low risk	0 low risk	71.5	42.6	1.47405	1	7.2					RT ± chemo	anthracycline-based regimens	2	56	153.791	No	153.791	no
197	72.8	<1.3	male	29	<60	17.9592	0-1	EUADT	stage III-IV	no	elevated	involved	>-2 sites	2-3intermediate risk	2-3	3-4 high risk	3-4 AGR<1.3	77.8	42.7	1.22	1	8.4	5.9	2	20.47		chemo alone	asparaginase-containing reigmens	5		5.19097	Yes	3.90965	yes
198	90.8	>=1.3	male	21	<60	21.3039	0-1	UADT	stage III-IV	yes	elevated	involved	>-2 sites	2-3intermediate risk	2-3	3-4 high risk	3-4 AGR>=1.3	75.3	42.7	1.30861	1	4.58	2.95	1.1	4.35		chemo alone	anthracycline-based regimens	6		6.04517	Yes	5.25667	yes
199	64.6	>=1.3	male	44	<60	22.4059	0-1	UADT	stage I-II	yes	normal	uninvolved	0-1 site	0-1low risk	0-1 (AGR>=1.3)	1-2 intermediate risk	1-2 intermediate risk	75.28	42.7	1.31062	1	7.71	3.16	2.98	3.59	13	chemo alone	asparaginase-containing reigmens	1		18.8255	No	18.8255	no
200	85.5	>=1.3	male	34	<60	22.8625	0-1	UADT	stage III-IV	no	elevated	involved	>-2 sites	2-3intermediate risk	2-3	3-4 high risk	3-4 AGR>=1.3	73.25	42.7	1.4	1	9	5	3	21.55		chemo alone	asparaginase-containing reigmens	6		24.3121	No	24.3121	no
201	80.04	>=1.3	male	43	<60	23.7118	0-1	UADT	stage I-II	no	normal	uninvolved	0-1 site	0-1low risk	0-1 (AGR>=1.3)	0 low risk	0 low risk	69.7	42.7	1.58148	1	4.5	2.3	1.4	0.6		chemo alone	anthracycline-based regimens	3		20.5667	Yes	20.5667	yes
202	68.64	>=1.3	male	65	>=60	19.9594	0-1	UADT	stage I-II	no	normal	uninvolved	0-1 site	2-3intermediate risk	2-3	1-2 intermediate risk	1-2 intermediate risk	75.12	42.9	1.3323	1	7.7	5.5	1.2	26.03		chemo alone	asparaginase-containing reigmens	2		61.8316	No	61.8316	no
203	63.67	>=1.3	male	64	>=60	25.8166	0-1	UADT	stage I-II	no	normal	uninvolved	0-1 site	0-1low risk	0-1 (AGR>=1.3)	0 low risk	0 low risk	69.77	42.9	1.5948	1	4	1.6	1.6	0.99		RT ± chemo	asparaginase-containing reigmens	1	60	85.0267	No	85.0267	no
204	49.3	>=1.3	female	28	<60	22.0386	0-1	UADT	stage I-II	no	normal	uninvolved	0-1 site	0-1low risk	0-1 (AGR>=1.3)	0 low risk	0 low risk	70.24	43	1.57856	1	5.1	3	1.7	0.5		RT ± chemo	asparaginase-containing reigmens	5	55	21.1253	No	21.1253	no
205	53.3	>=1.3	female	49	<60	19.736	0-1	UADT	stage I-II	yes	normal	uninvolved	0-1 site	0-1low risk	0-1 (AGR>=1.3)	1-2 intermediate risk	1-2 intermediate risk	73.37	43.2	1.44	1	11.3	9.5	1.3	0.75		RT ± chemo	asparaginase-containing reigmens	3	54.6	27.1704	No	27.1704	no
206	64.58	>=1.3	male	35	<60	20.7031	0-1	UADT	stage I-II	no	normal	uninvolved	0-1 site	0-1low risk	0-1 (AGR>=1.3)	0 low risk	0 low risk	67.26	43.2	1.79253	1	7.5	5.13	1.79	10.42		RT ± chemo	anthracycline-based regimens	6	46	80.7556	No	13.4045	yes
207	97	>=1.3	male	32	<60	25.0995	0-1	UADT	stage I-II	yes	normal	uninvolved	0-1 site	0-1low risk	0-1 (AGR>=1.3)	1-2 intermediate risk	1-2 intermediate risk	61.3	43.2	2.38674	1	5.4	3.5	1.4		2	RT ± chemo	anthracycline-based regimens	4	36	66.694	No	66.694	no
208	61.5	>=1.3	male	19	<60	19.6052	0-1	UADT	stage I-II	yes	elevated	uninvolved	0-1 site	0-1low risk	0-1 (AGR>=1.3)	1-2 intermediate risk	1-2 intermediate risk	73.63	43.3	1.42904	1	4.8	3.1	1.2	3.13		RT ± chemo	anthracycline-based regimens	5	56	34.6283	No	34.6283	no
209	74.59	>=1.3	male	43	<60	26.2336	0-1	UADT	stage I-II	no	normal	involved	0-1 site	0-1low risk	0-1 (AGR>=1.3)	1-2 intermediate risk	1-2 intermediate risk	76.05	43.3	1.32012	1	13.1	8.2	3.4	3.44		RT ± chemo	anthracycline-based regimens	1	56	64.8542	No	64.8542	no
210	60.9	<1.3	female	34	<60	20.8117	0-1	UADT	stage I-II	no	normal	involved	0-1 site	0-1low risk	0-1 (AGR<1.3)	1-2 intermediate risk	1-2 intermediate risk	81.29	43.4	1.14542	1	9.2	5.6	3.1	3.5		RT ± chemo	asparaginase-containing reigmens	5	54.6	15.2115	No	15.2115	no
211	60.34	>=1.3	female	64	>=60	20.7756	0-1	UADT	stage I-II	no	normal	uninvolved	0-1 site	0-1low risk	0-1 (AGR>=1.3)	0 low risk	0 low risk	73.12	43.5	1.46959	1	6.7	4.52	1.4	7.07		RT ± chemo	anthracycline-based regimens	3	46	60.3532	No	60.3532	no
212	68.3	>=1.3	male	43	<60	20.984	0-1	UADT	stage I-II	yes	normal	uninvolved	0-1 site	0-1low risk	0-1 (AGR>=1.3)	1-2 intermediate risk	1-2 intermediate risk	70.99	43.5	1.58239	1	10.3	6.8	2.8	2.98		RT ± chemo	asparaginase-containing reigmens	2	54.6	11.3676	No	11.3676	no
213	86.5	>=1.3	male	44	<60	21.2245	0-1	UADT	stage I-II	no	normal	uninvolved	0-1 site	0-1low risk	0-1 (AGR>=1.3)	0 low risk	0 low risk	73.98	43.5	1.42717	1	5.2	2.7	1.9	0.73	2	RT ± chemo	anthracycline-based regimens	4	55	22.8008	No	22.8008	no
214	37.1	>=1.3	female	47	<60	23.3091	0-1	UADT	stage I-II	no	normal	uninvolved	0-1 site	0-1low risk	0-1 (AGR>=1.3)	0 low risk	0 low risk	73.8	43.5	1.43564	1	5.52	3.62	1.57		11	chemo alone	asparaginase-containing reigmens	4		39.8522	No	39.8522	no
215	100	>=1.3	male	40	<60	17.9931	0-1	UADT	stage I-II	yes	normal	involved	0-1 site	0-1low risk	0-1 (AGR>=1.3)	1-2 intermediate risk	1-2 intermediate risk	72.2	43.6	1.52448	1	5.4	3.7	1.1			RT ± chemo	anthracycline-based regimens	4	56	133.06	No	133.06	no
216	56	>=1.3	female	41	<60	19.5556	0-1	UADT	stage I-II	yes	normal	uninvolved	0-1 site	0-1low risk	0-1 (AGR>=1.3)	1-2 intermediate risk	1-2 intermediate risk	73	43.6	1.48299	1	2.6	1.2	0.9	1.18		RT ± chemo	anthracycline-based regimens	6	54	95.8686	No	95.8686	no
217	70	>=1.3	male	29	<60	21.7993	0-1	EUADT	stage I-II	no	normal	uninvolved	0-1 site	0-1low risk	0-1 (AGR>=1.3)	0 low risk	0 low risk	64.8	43.6	2.0566	1	7.7	5.5	1.7	1.26		chemo alone	asparaginase-containing reigmens	6		19.0554	No	19.0554	no
218	67.78	>=1.3	male	51	<60	23.1837	0-1	UADT	stage III-IV	no	normal	uninvolved	>-2 sites	2-3intermediate risk	2-3	1-2 intermediate risk	1-2 intermediate risk	76.47	43.6	1.32523	1	7.1	4.6	2	4.12	7	chemo alone	anthracycline-based regimens	2		5.48665	Yes	1.47844	yes
219	53.3	>=1.3	female	45	<60	26.0375	0-1	UADT	stage I-II	no	normal	involved	0-1 site	0-1low risk	0-1 (AGR>=1.3)	1-2 intermediate risk	1-2 intermediate risk	72.92	43.6	1.48704	1	9	4.42	3.64	0.25		RT ± chemo	anthracycline-based regimens	3	54.6	6.83368	Yes	4.73101	yes
220	66	>=1.3	female	27	<60	26.3702	0-1	UADT	stage I-II	no	normal	uninvolved	0-1 site	0-1low risk	0-1 (AGR>=1.3)	0 low risk	0 low risk	61.8	43.6	2.3956	1	6.4	3.8	1.8	0.6	5	RT ± chemo	anthracycline-based regimens	7	54	86.1109	No	86.1109	no
221	102.4	>=1.3	male	36	<60	26.449	>=2	EUADT	stage III-IV	yes	elevated	involved	>-2 sites	4-5high risk	4-5	3-4 high risk	3-4 AGR>=1.3	73.4	43.6	1.46309	1	3.6	2.6	0.8	11.37	11	chemo alone	anthracycline-based regimens	6		9.56057	Yes	3.58111	yes
222	44	>=1.3	female	29	<60	17.6693	0-1	UADT	stage I-II	no	normal	uninvolved	0-1 site	0-1low risk	0-1 (AGR>=1.3)	0 low risk	0 low risk	70.95	43.7	1.60073	1	5.8	3.8	1.8	1.72		chemo alone	anthracycline-based regimens	4		36.8296	No	36.8296	no
223	77.77	>=1.3	male	50	<60	21.7738	0-1	UADT	stage I-II	yes	elevated	involved	0-1 site	0-1low risk	0-1 (AGR>=1.3)	3-4 high risk	3-4 AGR>=1.3	74.36	43.7	1.42345	1	6.9	4.6	1.49	10.79		chemo alone	anthracycline-based regimens	6		78.6201	No	78.6201	no
224	58.74	<1.3	female	38	<60	29.9376	0-1	UADT	stage I-II	no	normal	uninvolved	0-1 site	0-1low risk	0-1 (AGR<1.3)	0 low risk	0 low risk	84.61	43.7	1.06846	1	8.2	5.75	1.72	30.9		RT ± chemo	asparaginase-containing reigmens	4	54.6	62.193	No	21.0595	yes
225	63	>=1.3	female	32	<60	18.3655	0-1	UADT	stage I-II	no	elevated	uninvolved	0-1 site	0-1low risk	0-1 (AGR>=1.3)	1-2 intermediate risk	1-2 intermediate risk	77.1	43.8	1.31532	1	4.3	2.2	1.4			RT ± chemo	anthracycline-based regimens	2	50	111.54	No	111.54	no
226	56.5	>=1.3	female	46	<60	20.0288	0-1	UADT	stage I-II	no	normal	involved	0-1 site	0-1low risk	0-1 (AGR>=1.3)	1-2 intermediate risk	1-2 intermediate risk	75.73	43.8	1.37304	1	8.2	4.7	2.7	11.11	11	RT ± chemo	asparaginase-containing reigmens	4	56	41.7906	No	41.7906	no
227	89	>=1.3	male	34	<60	29.737	0-1	UADT	stage I-II	no	normal	involved	0-1 site	0-1low risk	0-1 (AGR>=1.3)	1-2 intermediate risk	1-2 intermediate risk	75.1	43.8	1.39936	1	10.6	6.1	2.9			RT ± chemo	anthracycline-based regimens	4	60	9.36345	Yes	3.97536	yes
228	68	<1.3	male	53	<60	20.8889	0-1	UADT	stage I-II	no	normal	involved	0-1 site	0-1low risk	0-1 (AGR<1.3)	1-2 intermediate risk	1-2 intermediate risk	80.5	44	1.20548	1	5.2	2.9	2	1.3		chemo alone		4		3.41684	Yes	3.41684	yes
229	59.1	<1.3	male	37	<60	21.8724	0-1	UADT	stage I-II	yes	normal	uninvolved	0-1 site	0-1low risk	0-1 (AGR<1.3)	1-2 intermediate risk	1-2 intermediate risk	82.05	44	1.15637	1	10.2	7.02	2.46	16.35	50	RT ± chemo	asparaginase-containing reigmens	5	56	20.9281	No	20.9281	no
230	66.5	>=1.3	male	39	<60	23.5479	0-1	UADT	stage I-II	no	normal	uninvolved	0-1 site	0-1low risk	0-1 (AGR>=1.3)	0 low risk	0 low risk	73.75	44	1.47651	1	6.3	3.88	1.83	0.39		RT ± chemo	anthracycline-based regimens	3	50	66.4641	No	66.4641	no
231	86	>=1.3	male	41	<60	27.6361	0-1	UADT	stage I-II	yes	normal	uninvolved	0-1 site	0-1low risk	0-1 (AGR>=1.3)	1-2 intermediate risk	1-2 intermediate risk	67	44	1.91304	1	6.2	3.65	2.55			RT ± chemo	asparaginase-containing reigmens	2	56	48.8871	No	48.8871	no
232	41.8	>=1.3	female	23	<60	19.6283	0-1	UADT	stage I-II	yes	elevated	uninvolved	0-1 site	0-1low risk	0-1 (AGR>=1.3)	1-2 intermediate risk	1-2 intermediate risk	77.65	44.1	1.31642	1	2.3	1.1	0.9	9.59	40	RT ± chemo	anthracycline-based regimens	4	50	29.0431	No	29.0431	no
233	96.2	>=1.3	male	37	<60	23.8751	0-1	UADT	stage I-II	no	normal	uninvolved	0-1 site	0-1low risk	0-1 (AGR>=1.3)	0 low risk	0 low risk	73.21	44.1	1.51494	1	7.3	4.1	2.6	4.21		RT ± chemo		0	56.4	18.2341	No	18.2341	no
234	56.1	>=1.3	male	49	<60	24.2424	0-1	UADT	stage I-II	yes	elevated	uninvolved	0-1 site	0-1low risk	0-1 (AGR>=1.3)	1-2 intermediate risk	1-2 intermediate risk	77.07	44.1	1.33636	1	8.49	5.4	2	8.08		RT ± chemo	anthracycline-based regimens	4	56	37.0267	No	37.0267	no
235	53.27	>=1.3	female	29	<60	23.2335	0-1	UADT	stage I-II	no	normal	uninvolved	0-1 site	0-1low risk	0-1 (AGR>=1.3)	0 low risk	0 low risk	78.18	44.2	1.3	1	8.3	4.7	2.9	13.54	32	RT ± chemo	anthracycline-based regimens	2	54.6	52.2053	No	52.2053	no
236	79	>=1.3	male	45	<60	15.5896	0-1	UADT	stage I-II	yes	normal	involved	0-1 site	0-1low risk	0-1 (AGR>=1.3)	1-2 intermediate risk	1-2 intermediate risk	75.74	44.3	1.41083	1	7.1	3	2.8	24.83		RT ± chemo	asparaginase-containing reigmens	3	54.6	33.7741	No	33.7741	no
237	79.6	<1.3	male	45	<60	25.1024	0-1	UADT	stage I-II	no	normal	uninvolved	0-1 site	0-1low risk	0-1 (AGR<1.3)	0 low risk	0 low risk	81.15	44.3	1.20217	1	4.5	2.18	1.96	1.45	50	RT ± chemo	anthracycline-based regimens	5	56	24.8378	No	24.8378	no
238	69.82	>=1.3	male	42	<60	18.2066	0-1	UADT	stage I-II	yes	normal	involved	0-1 site	0-1low risk	0-1 (AGR>=1.3)	1-2 intermediate risk	1-2 intermediate risk	74.27	44.5	1.49329	1	5.6	3.4	1.6	8.4	15	RT ± chemo	anthracycline-based regimens	3	56	48.0986	No	48.0986	no
239	73.1	<1.3	male	37	<60	19.5717	0-1	UADT	stage III-IV	yes	normal	involved	0-1 site	0-1low risk	0-1 (AGR<1.3)	3-4 high risk	3-4 AGR<1.3	86.24	44.5	1.06715	1	10	5.4	3.6	3.1		chemo alone	asparaginase-containing reigmens	6		33.6427	No	33.6427	no
240	47.66	>=1.3	female	41	<60	21.3599	>=2	EUADT	stage I-II	yes	normal	involved	0-1 site	0-1low risk	0-1 (AGR>=1.3)	1-2 intermediate risk	1-2 intermediate risk	69.06	44.5	1.80894	1	5.6	4.6	0.5			chemo alone	asparaginase-containing reigmens	3		76.2218	No	2.98973	yes
241	78.31	>=1.3	male	66	>=60	22.3863	0-1	UADT	stage I-II	no	normal	involved	0-1 site	0-1low risk	0-1 (AGR>=1.3)	1-2 intermediate risk	1-2 intermediate risk	72.9	44.5	1.5669	1	5.1	3	1.4	2.5	5	RT ± chemo	anthracycline-based regimens	5	56	7.68789	Yes	7.68789	no
242	80.7	>=1.3	male	43	<60	21.3578	0-1	UADT	stage I-II	no	normal	involved	0-1 site	0-1low risk	0-1 (AGR>=1.3)	1-2 intermediate risk	1-2 intermediate risk	72.16	44.7	1.62545	1	5.4	3.5	1.3	1.096		RT ± chemo	anthracycline-based regimens	3	50	31.3758	No	31.3758	no
243	116	>=1.3	male	32	<60	23.3355	0-1	UADT	stage I-II	no	normal	uninvolved	0-1 site	0-1low risk	0-1 (AGR>=1.3)	0 low risk	0 low risk	72.6	44.7	1.60215	1	7.4	3.9	2.4		3	RT ± chemo	asparaginase-containing reigmens	9	46	13.7659	Yes	9.7577	yes
244	72.3	>=1.3	male	37	<60	23.3355	0-1	UADT	stage I-II	no	normal	uninvolved	0-1 site	0-1low risk	0-1 (AGR>=1.3)	0 low risk	0 low risk	76.72	44.7	1.39688	1	5.5	3.2	1.8	2.38		chemo alone	asparaginase-containing reigmens	2		32.46	No	32.46	no
245	90.7	>=1.3	male	43	<60	23.8281	0-1	UADT	stage I-II	yes	normal	uninvolved	0-1 site	0-1low risk	0-1 (AGR>=1.3)	1-2 intermediate risk	1-2 intermediate risk	74.45	44.7	1.5	1	7.5	4.3	1.8	5.38	4	chemo alone	anthracycline-based regimens	6		6.50513	Yes	5.28953	yes
246	53.37	>=1.3	female	38	<60	19.736	0-1	UADT	stage I-II	yes	normal	uninvolved	0-1 site	0-1low risk	0-1 (AGR>=1.3)	1-2 intermediate risk	1-2 intermediate risk	73.87	44.8	1.53952	1	4.1	2.1	1.5	0.33		RT ± chemo	asparaginase-containing reigmens	2	64	57.9548	No	57.9548	no
247	76	>=1.3	male	60	>=60	20.8117	0-1	UADT	stage I-II	no	elevated	uninvolved	0-1 site	2-3intermediate risk	2-3	1-2 intermediate risk	1-2 intermediate risk	77.1	44.8	1.387	1	6.2	2.9	2.6		11	RT ± chemo	anthracycline-based regimens	4	60	20.2053	Yes	20.2053	yes
248	41.47	>=1.3	female	33	<60	24.0344	0-1	UADT	stage I-II	no	normal	uninvolved	0-1 site	0-1low risk	0-1 (AGR>=1.3)	0 low risk	0 low risk	79.05	44.8	1.30612	1	6.5	3.7	2.1	0.57	9	RT ± chemo	anthracycline-based regimens	6	56	59.6961	No	59.6961	no
249	68.77	>=1.3	male	60	>=60	25.0135	0-1	UADT	stage I-II	no	normal	uninvolved	0-1 site	0-1low risk	0-1 (AGR>=1.3)	0 low risk	0 low risk	75	44.8	1.48344	1	8.6	6	1.7	1.71		RT ± chemo	anthracycline-based regimens	5	56	76.7803	No	76.7803	no
250	54.1	<1.3	female	27	<60	17.6309	0-1	UADT	stage I-II	yes	normal	uninvolved	0-1 site	0-1low risk	0-1 (AGR<1.3)	1-2 intermediate risk	1-2 intermediate risk	82.63	44.9	1.19003	1	4.7	2.3	2	3.15		RT ± chemo	asparaginase-containing reigmens	3	54.6	19.614	No	19.614	no
251	87.27	>=1.3	male	37	<60	22.0581	0-1	UADT	stage I-II	no	normal	involved	0-1 site	0-1low risk	0-1 (AGR>=1.3)	1-2 intermediate risk	1-2 intermediate risk	73.34	44.9	1.58099	1	5.5	3.7	1.2	6.73	21	RT ± chemo	anthracycline-based regimens	2	56	7.62218	Yes	2.95688	yes
252	41.2	>=1.3	female	32	<60	22.8624	0-1	UADT	stage I-II	no	normal	uninvolved	0-1 site	0-1low risk	0-1 (AGR>=1.3)	0 low risk	0 low risk	76.44	44.9	1.42359	1	6.9	4.15	2.14	7.28	25	RT ± chemo	asparaginase-containing reigmens	6	54.6	22.538	No	22.538	no
253	78.05	>=1.3	male	33	<60	29.7609	0-1	UADT	stage I-II	no	normal	uninvolved	0-1 site	0-1low risk	0-1 (AGR>=1.3)	0 low risk	0 low risk	70.76	44.9	1.73359	1	8.2	5.2	2.2	8.62		RT ± chemo	anthracycline-based regimens	2	50	54.5051	No	54.5051	no
254	56	>=1.3	female	24	<60	16.5607	0-1	UADT	stage I-II	no	normal	uninvolved	0-1 site	0-1low risk	0-1 (AGR>=1.3)	0 low risk	0 low risk	71.7	45	1.68539	1	4	2.5	1.3			chemo alone	anthracycline-based regimens	2		24.6078	No	24.6078	no
255	81.84	>=1.3	male	48	<60	18.7328	>=2	UADT	stage III-IV	yes	normal	involved	>-2 sites	2-3intermediate risk	2-3	3-4 high risk	3-4 AGR>=1.3	68	45	1.36364	1	9.5	5.8	2.5	2.54		chemo alone	anthracycline-based regimens	2		9.10062	Yes	1.90554	yes
256	43.5	<1.3	female	19	<60	18.8189	0-1	EUADT	stage I-II	no	normal	uninvolved	0-1 site	0-1low risk	0-1 (AGR<1.3)	0 low risk	0 low risk	32.48	45	0.580795	1	3.5	2.1	0.9	0.47		chemo alone	asparaginase-containing reigmens	2		22.2423	No	22.2423	no
257	88.79	<1.3	male	33	<60	23.255	0-1	EUADT	stage III-IV	yes	elevated	uninvolved	>-2 sites	2-3intermediate risk	2-3	3-4 high risk	3-4 AGR<1.3	82.18	45	1.22283	1	8.2	4.3	2.3	14.03		chemo alone	anthracycline-based regimens	4		14.0616	Yes	3.05544	yes
258	56.1	>=1.3	male	60	>=60	25.0399	0-1	UADT	stage III-IV	no	normal	uninvolved	>-2 sites	2-3intermediate risk	2-3	1-2 intermediate risk	1-2 intermediate risk	72.7	45	1.62455	1	8.85	6.87	1.2			chemo alone	asparaginase-containing reigmens	6		26.3162	Yes	5.51951	yes
259	49	>=1.3	male	33	<60	17.3611	0-1	UADT	stage I-II	yes	normal	uninvolved	0-1 site	0-1low risk	0-1 (AGR>=1.3)	1-2 intermediate risk	1-2 intermediate risk	79.7	45.1	1.30347	1	5.4	3.2	1.6		10	RT ± chemo	anthracycline-based regimens	7	60	59.9918	Yes	50.4969	yes
260	86	>=1.3	female	48	<60	24.2439	0-1	EUADT	stage III-IV	no	normal	uninvolved	>-2 sites	2-3intermediate risk	2-3	1-2 intermediate risk	1-2 intermediate risk	70.7	45.1	1.52365	1	4	2.1	1.3		7	RT ± chemo	anthracycline-based regimens	6	45	133.717	No	133.717	no
261	60.08	>=1.3	male	27	<60	19.8141	0-1	UADT	stage I-II	yes	elevated	involved	0-1 site	2-3intermediate risk	2-3	3-4 high risk	3-4 AGR>=1.3	79.61	45.2	1.31395	1	4.3	2.62	1.41	15.58		RT ± chemo	anthracycline-based regimens	6	60	71.5236	No	71.5236	no
262	48.5	>=1.3	female	38	<60	23.4952	0-1	UADT	stage I-II	yes	elevated	uninvolved	0-1 site	0-1low risk	0-1 (AGR>=1.3)	1-2 intermediate risk	1-2 intermediate risk	70.12	45.2	1.8138	1	6.8	3.3	2.6	0.8		RT ± chemo	asparaginase-containing reigmens	2	36.4	13.2402	No	13.2402	no
263	78	<1.3	male	33	<60	23.7954	0-1	UADT	stage I-II	yes	normal	involved	0-1 site	0-1low risk	0-1 (AGR<1.3)	1-2 intermediate risk	1-2 intermediate risk	81.6	45.2	1.24176	1	6.7	4.6	1.4			RT ± chemo	anthracycline-based regimens	4	60	8.73922	Yes	8.73922	yes
264	67.4	<1.3	male	27	<60	20.3125	0-1	UADT	stage I-II	yes	normal	involved	0-1 site	0-1low risk	0-1 (AGR<1.3)	1-2 intermediate risk	1-2 intermediate risk	82.55	45.3	1.21448	1	6.85	4	1.6	5.81		RT ± chemo	anthracycline-based regimens	4	56	10.0534	Yes	7.91786	yes
265	71	>=1.3	male	17	<60	22.5896	>=2	UADT	stage III-IV	yes	normal	uninvolved	>-2 sites	2-3intermediate risk	2-3	1-2 intermediate risk	1-2 intermediate risk	65.7	45.3	1.74231	1	7.4	1.5	4.1			chemo alone	anthracycline-based regimens	6		30.4559	Yes	12.9774	yes
266	64.8	>=1.3	male	33	<60	19.1571	0-1	UADT	stage I-II	yes	normal	uninvolved	0-1 site	0-1low risk	0-1 (AGR>=1.3)	1-2 intermediate risk	1-2 intermediate risk	79.34	45.4	1.33529	1	4.9	1.6	2.8	2.063		RT ± chemo	asparaginase-containing reigmens	3	54.6	33.0842	No	33.0842	no
267	55.72	>=1.3	female	43	<60	20.0288	0-1	UADT	stage I-II	yes	normal	involved	0-1 site	0-1low risk	0-1 (AGR>=1.3)	1-2 intermediate risk	1-2 intermediate risk	75.85	45.4	1.48852	1	6.4	3.9	1.4	1.45	40	RT ± chemo	anthracycline-based regimens	4	56	9.00205	Yes	9.00205	yes
268	96.73	>=1.3	male	47	<60	28.3937	0-1	UADT	stage I-II	no	elevated	involved	0-1 site	0-1low risk	0-1 (AGR>=1.3)	1-2 intermediate risk	1-2 intermediate risk	76.49	45.4	1.45981	1	5	2.88	1.36	4.3		chemo alone	anthracycline-based regimens	3		19.9097	Yes	19.9097	yes
269	63.6	>=1.3	male	39	<60	19.0039	0-1	UADT	stage I-II	yes	normal	uninvolved	0-1 site	0-1low risk	0-1 (AGR>=1.3)	1-2 intermediate risk	1-2 intermediate risk	74.73	45.5	1.55822	1	11.5	9.1	1.3	2.62		RT ± chemo		0	54.6	27.5647	No	27.5647	no
270	53	<1.3	female	30	<60	18.8189	0-1	UADT	stage III-IV	yes	normal	involved	>-2 sites	2-3intermediate risk	2-3	3-4 high risk	3-4 AGR<1.3	89.15	45.6	1.04828	1	6.2	4.7	0.9	4.81		RT ± chemo	asparaginase-containing reigmens	4	56	18.3984	Yes	9.29774	yes
271	51.7	>=1.3	male	21	<60	20.1956	0-1	UADT	stage I-II	no	normal	uninvolved	0-1 site	0-1low risk	0-1 (AGR>=1.3)	0 low risk	0 low risk	79.53	45.6	1.34118	1	6.5	3.8	2	14.81		RT ± chemo	asparaginase-containing reigmens	6	54.6	22.6366	No	22.6366	no
272	82.1	>=1.3	male	47	<60	20.5688	0-1	UADT	stage I-II	yes	normal	involved	0-1 site	0-1low risk	0-1 (AGR>=1.3)	1-2 intermediate risk	1-2 intermediate risk	77.2	45.6	1.44304	1	5.2	3.8	0.9	1.17		RT ± chemo	anthracycline-based regimens	4	40	39.8193	No	39.8193	no
273	64	>=1.3	male	46	<60	21.2585	0-1	UADT	stage I-II	no	normal	uninvolved	0-1 site	0-1low risk	0-1 (AGR>=1.3)	0 low risk	0 low risk	72.1	45.6	1.72075	1	5.9	2.6	2.6		10	RT ± chemo	anthracycline-based regimens	4	60	106.48	No	106.48	no
274	74	>=1.3	male	37	<60	23.1473	0-1	UADT	stage I-II	no	normal	uninvolved	0-1 site	0-1low risk	0-1 (AGR>=1.3)	0 low risk	0 low risk	72.2	45.6	1.71429	1	4.3	2.8	1			RT ± chemo	anthracycline-based regimens	3	50	62.6858	Yes	42.6776	yes
275	88.7	>=1.3	male	25	<60	28.2284	0-1	UADT	stage III-IV	no	elevated	uninvolved	0-1 site	2-3intermediate risk	2-3	1-2 intermediate risk	1-2 intermediate risk	72.66	45.6	1.68266	1	9.6	3.5	5.4	12.05		RT ± chemo	anthracycline-based regimens	4	36	37.7495	No	37.7495	no
276	43.3	>=1.3	female	18	<60	18.5529	0-1	UADT	stage I-II	no	normal	uninvolved	0-1 site	0-1low risk	0-1 (AGR>=1.3)	0 low risk	0 low risk	79.13	45.7	1.36826	1	4.65	2.9	1.1	3.89		RT ± chemo	anthracycline-based regimens	4	50	35.1869	No	24.6735	yes
277	78.9	>=1.3	male	47	<60	26.6436	0-1	UADT	stage I-II	no	normal	uninvolved	0-1 site	0-1low risk	0-1 (AGR>=1.3)	0 low risk	0 low risk	79.4	45.7	1.35608	1	6.25	3.25	1.99	1.13	7	RT ± chemo	anthracycline-based regimens	5	54	23.3922	No	23.3922	no
278	76.4	>=1.3	male	26	<60	18.8268	0-1	UADT	stage I-II	yes	normal	uninvolved	0-1 site	0-1low risk	0-1 (AGR>=1.3)	1-2 intermediate risk	1-2 intermediate risk	75.54	45.8	1.54001	1	5.3	3.3	1.4	0.41	2	chemo alone	asparaginase-containing reigmens	4		15.1129	No	8.08214	yes
279	58.12	>=1.3	female	39	<60	20.83	0-1	UADT	stage I-II	no	normal	uninvolved	0-1 site	0-1low risk	0-1 (AGR>=1.3)	0 low risk	0 low risk	80.95	45.9	1.31143	1	4.9	2.74	1.62	0.18		RT ± chemo	asparaginase-containing reigmens	3	50	67.2197	No	67.2197	no
280	42	>=1.3	female	24	<60	20	0-1	UADT	stage I-II	no	normal	uninvolved	0-1 site	0-1low risk	0-1 (AGR>=1.3)	0 low risk	0 low risk	75.3	46	1.56997	1	5.7	3.3	1.7		28	RT ± chemo	anthracycline-based regimens	6	46	96.3285	No	96.3285	no
281	85	>=1.3	male	61	>=60	23.255	0-1	UADT	stage I-II	yes	elevated	involved	0-1 site	2-3intermediate risk	2-3	1-2 intermediate risk	1-2 intermediate risk	76	46	1.53333	1	5.2	2.4	1.9		25	RT ± chemo	asparaginase-containing reigmens	4	50	65.9713	No	65.9713	no
282	71.63	>=1.3	male	40	<60	16.1415	>=2	UADT	stage I-II	yes	normal	involved	0-1 site	0-1low risk	0-1 (AGR>=1.3)	1-2 intermediate risk	1-2 intermediate risk	75.2	46.1	1.57877	1	7.5	5.5	1	1.53		RT ± chemo	anthracycline-based regimens	6	60	30.5216	Yes	30.5216	yes
283	94.25	>=1.3	male	44	<60	18.2149	0-1	UADT	stage I-II	yes	normal	involved	0-1 site	0-1low risk	0-1 (AGR>=1.3)	1-2 intermediate risk	1-2 intermediate risk	68.48	46.2	2.07175	1	5.2	3.3	1.1	1.74		RT ± chemo	anthracycline-based regimens	2	60	77.0431	No	21.5524	yes
284	78.4	>=1.3	male	44	<60	22.7204	0-1	EUADT	stage I-II	no	normal	uninvolved	0-1 site	0-1low risk	0-1 (AGR>=1.3)	0 low risk	0 low risk	72.8	46.2	1.73684	1	5.7	3.13	1.96	0.43	2	chemo alone	anthracycline-based regimens	2		74.4148	No	8.6078	yes
285	67.9	>=1.3	male	47	<60	24.4473	0-1	UADT	stage I-II	no	normal	uninvolved	0-1 site	0-1low risk	0-1 (AGR>=1.3)	0 low risk	0 low risk	70.9	46.2	1.87045	1	6.49	4.5	1.5	1.03	3	RT ± chemo	anthracycline-based regimens	5	54.6	41.4949	No	41.4949	no
286	78	>=1.3	male	41	<60	24.3865	0-1	UADT	stage I-II	no	normal	uninvolved	0-1 site	0-1low risk	0-1 (AGR>=1.3)	0 low risk	0 low risk	76.15	46.3	1.60208	1	7	4.3	1.9	1.19		RT ± chemo	anthracycline-based regimens	3	50	32.6899	Yes	32.6899	yes
287	62.3	>=1.3	female	56	<60	23.4375	0-1	UADT	stage I-II	yes	elevated	uninvolved	0-1 site	0-1low risk	0-1 (AGR>=1.3)	1-2 intermediate risk	1-2 intermediate risk	74.07	46.4	1.67509	1	2.7	1.3	1.2	3.24		RT ± chemo	asparaginase-containing reigmens	6	54.6	34.9569	No	34.9569	no
288	70.7	>=1.3	male	17	<60	16.609	0-1	UADT	stage I-II	yes	normal	uninvolved	0-1 site	0-1low risk	0-1 (AGR>=1.3)	1-2 intermediate risk	1-2 intermediate risk	78.7	46.6	1.45171	1	5.3	2.4	2.2	5.56		RT ± chemo	anthracycline-based regimens	3	54.6	47.4415	No	47.4415	no
289	99.37	>=1.3	male	26	<60	19.4874	0-1	EUADT	stage I-II	no	normal	uninvolved	0-1 site	0-1low risk	0-1 (AGR>=1.3)	0 low risk	0 low risk	74.8	46.6	1.65248	1	11	6.5	3.3	0.22		RT ± chemo	asparaginase-containing reigmens	5	50	13.9959	Yes	10.9405	yes
290	88.1	>=1.3	male	35	<60	29.0367	0-1	UADT	stage I-II	no	normal	uninvolved	0-1 site	0-1low risk	0-1 (AGR>=1.3)	0 low risk	0 low risk	79.94	46.6	1.3994	1	6.9	3.5	2.9	0.93	16	RT ± chemo	anthracycline-based regimens	5	54.6	32.2957	No	32.2957	no
291	76.1	>=1.3	male	40	<60	20.7612	0-1	UADT	stage I-II	yes	normal	uninvolved	0-1 site	0-1low risk	0-1 (AGR>=1.3)	1-2 intermediate risk	1-2 intermediate risk	74.86	46.7	1.65603	1	6.1	4.5	1.2	0.96		RT ± chemo	anthracycline-based regimens	5	56	16.2628	Yes	14.9815	yes
292	58.3	>=1.3	female	35	<60	19.6283	0-1	UADT	stage I-II	no	normal	uninvolved	0-1 site	0-1low risk	0-1 (AGR>=1.3)	0 low risk	0 low risk	79.44	46.9	1.44308	1	4.8	2.2	2.1	0.49		RT ± chemo	anthracycline-based regimens	6	54	14.3573	Yes	14.3573	yes
293	50.5	>=1.3	female	49	<60	20.5688	0-1	UADT	stage I-II	no	normal	uninvolved	0-1 site	0-1low risk	0-1 (AGR>=1.3)	0 low risk	0 low risk	74.54	46.9	1.69928	1	4.42	1.9	2.2	1.09	14	RT ± chemo	anthracycline-based regimens	5	54	20.5996	Yes	6.83368	yes
294	72.98	>=1.3	male	54	<60	26.6436	0-1	UADT	stage I-II	no	normal	uninvolved	0-1 site	0-1low risk	0-1 (AGR>=1.3)	0 low risk	0 low risk	63.8	46.9	2.77515	1	3.1	1.56	1	0.6	2	RT ± chemo	anthracycline-based regimens	4	56	75.1376	No	75.1376	no
295	56.53	>=1.3	female	52	<60	21.2585	0-1	UADT	stage I-II	yes	normal	uninvolved	0-1 site	0-1low risk	0-1 (AGR>=1.3)	1-2 intermediate risk	1-2 intermediate risk	65.7	47	2.51337	1	4.7	2.8	1.6	0.27		RT ± chemo	anthracycline-based regimens	5	46	76.9774	No	76.9774	no
296	87	>=1.3	female	42	<60	20.7756	0-1	UADT	stage I-II	no	normal	involved	0-1 site	0-1low risk	0-1 (AGR>=1.3)	1-2 intermediate risk	1-2 intermediate risk	76	47.1	1.62976	1	5.2	2.2	1.4		5	RT ± chemo	anthracycline-based regimens	6	50	123.598	No	123.598	no
297	108	>=1.3	male	35	<60	27.6817	0-1	UADT	stage I-II	no	normal	uninvolved	0-1 site	0-1low risk	0-1 (AGR>=1.3)	0 low risk	0 low risk	76	47.1	1.62976	1	5.6	3.6	1.3			RT ± chemo	anthracycline-based regimens	4	40	130.333	No	20.2382	yes
298	52.53	>=1.3	female	38	<60	22.8928	0-1	UADT	stage I-II	no	normal	uninvolved	0-1 site	0-1low risk	0-1 (AGR>=1.3)	0 low risk	0 low risk	79.3	47.2	1.4704	1	5.5	2.4	2.8			RT ± chemo	anthracycline-based regimens	6	50	43.039	Yes	21.0267	yes
299	81.3	>=1.3	male	42	<60	25.7117	0-1	UADT	stage III-IV	no	normal	involved	0-1 site	0-1low risk	0-1 (AGR>=1.3)	1-2 intermediate risk	1-2 intermediate risk	78	47.2	1.53247	1	7.4	4.7	2.3	6.4		RT ± chemo	asparaginase-containing reigmens	6	50	20.271	No	31.4743	no
300	81.3	>=1.3	male	42	<60	25.7117	0-1	UADT	stage I-II	no	normal	uninvolved	0-1 site	0-1low risk	0-1 (AGR>=1.3)	0 low risk	0 low risk	78	47.2	1.53247	1	7.4	4.7	2.3	6.4		RT ± chemo	asparaginase-containing reigmens	5	54.6	27.4004	No	27.4004	no
301	65.8	>=1.3	male	46	<60	21.4692	0-1	UADT	stage I-II	no	normal	uninvolved	0-1 site	0-1low risk	0-1 (AGR>=1.3)	0 low risk	0 low risk	82.92	47.3	1.31389	1	8.2	6.5	1.6	3.89		RT ± chemo	asparaginase-containing reigmens	3	52	28.5832	No	28.5832	no
302	52.43	>=1.3	female	54	<60	19.7777	0-1	UADT	stage I-II	yes	normal	uninvolved	0-1 site	0-1low risk	0-1 (AGR>=1.3)	1-2 intermediate risk	1-2 intermediate risk	80.42	47.4	1.43636	1	10.1	7.4	2.18	1.34	22	RT ± chemo	anthracycline-based regimens	6	50	60.0903	No	60.0903	no
303	42	>=1.3	female	29	<60	21.7738	0-1	UADT	stage I-II	no	normal	uninvolved	0-1 site	0-1low risk	0-1 (AGR>=1.3)	0 low risk	0 low risk	77.1	47.4	1.59596	1	6.4	3.8	1.8			RT ± chemo	anthracycline-based regimens	6	46	100.731	No	63.3429	yes
304	108	>=1.3	male	51	<60	24.2424	0-1	UADT	stage I-II	no	normal	uninvolved	0-1 site	0-1low risk	0-1 (AGR>=1.3)	0 low risk	0 low risk	70	47.5	2.11111	1	12.4	10.1	1.2			RT ± chemo	anthracycline-based regimens	6	54	17.7084	Yes	17.7084	yes
305	71	>=1.3	male	54	<60	22.3214	0-1	UADT	stage I-II	no	normal	uninvolved	0-1 site	0-1low risk	0-1 (AGR>=1.3)	0 low risk	0 low risk	82.2	47.7	1.38261	1	6.7	4.6	1.3			RT ± chemo	anthracycline-based regimens	5	54	108.747	No	108.747	no
306	71	>=1.3	male	40	<60	27.9431	0-1	UADT	stage I-II	yes	normal	involved	0-1 site	0-1low risk	0-1 (AGR>=1.3)	1-2 intermediate risk	1-2 intermediate risk	77.17	47.7	1.61695	1	5.8	3.3	2	16.97	8	RT ± chemo	anthracycline-based regimens	5	60	81.347	No	24.7064	yes
307	71	>=1.3	male	39	<60	28.2828	0-1	UADT	stage I-II	yes	normal	involved	0-1 site	0-1low risk	0-1 (AGR>=1.3)	1-2 intermediate risk	1-2 intermediate risk	77.17	47.7	1.61695	1	5.8	3.3	2		8	RT ± chemo	anthracycline-based regimens	6	60	80.5257	No	24.7392	yes
308	91.2	>=1.3	male	37	<60	20.3704	0-1	UADT	stage I-II	no	normal	uninvolved	0-1 site	0-1low risk	0-1 (AGR>=1.3)	0 low risk	0 low risk	79.98	47.8	1.48539	1	5	3.34	1.07	0.79		RT ± chemo	asparaginase-containing reigmens	6	54.6	26.4476	No	26.4476	no
309	64	>=1.3	female	57	<60	23.1247	0-1	UADT	stage I-II	no	normal	uninvolved	0-1 site	0-1low risk	0-1 (AGR>=1.3)	0 low risk	0 low risk	76.4	48.1	1.69965	1	7.2	4.4	1.7	6.65		chemo alone	anthracycline-based regimens	3		89.0021	No	89.0021	no
310	95	>=1.3	female	31	<60	19.7232	0-1	UADT	stage I-II	yes	normal	uninvolved	0-1 site	0-1low risk	0-1 (AGR>=1.3)	0 low risk	0 low risk	80.2	48.2	1.50625	1	7.6	4.3	2.2			RT ± chemo	anthracycline-based regimens	4	36	119.458	No	89.1335	yes
311	97	>=1.3	male	29	<60	22.7732	0-1	UADT	stage I-II	no	elevated	uninvolved	0-1 site	0-1low risk	0-1 (AGR>=1.3)	1-2 intermediate risk	1-2 intermediate risk	85.3	48.4	1.31165	1	4	1.8	1.5			RT ± chemo	anthracycline-based regimens	1	50	3.54825	Yes	3.25257	yes
312	100.77	>=1.3	male	68	>=60	18.6115	0-1	UADT	stage I-II	no	normal	uninvolved	0-1 site	0-1low risk	0-1 (AGR>=1.3)	0 low risk	0 low risk	73.4	48.5	1.94	1	6.5	4.4	1.8			RT ± chemo	asparaginase-containing reigmens	2	60	48.2957	No	48.2957	no
313	65	>=1.3	female	34	<60	20	0-1	UADT	stage I-II	no	normal	uninvolved	0-1 site	0-1low risk	0-1 (AGR>=1.3)	0 low risk	0 low risk	73.4	48.5	1.94	1	5.9	3.9	1.8	2.77	3	RT ± chemo	anthracycline-based regimens	6	40	26.7433	Yes	26.7433	yes
314	67	>=1.3	male	37	<60	24.2188	0-1	UADT	stage I-II	no	elevated	uninvolved	0-1 site	0-1low risk	0-1 (AGR>=1.3)	1-2 intermediate risk	1-2 intermediate risk	73.4	48.5	1.94	1	8.8	5	2.5	2.77	3	RT ± chemo	anthracycline-based regimens	3	64	80.0657	No	80.0657	no
315	70	>=1.3	male	34	<60	20.202	0-1	UADT	stage I-II	no	normal	uninvolved	0-1 site	0-1low risk	0-1 (AGR>=1.3)	0 low risk	0 low risk	77	48.6	1.71127	1	3.8	1.7	1.1	1.95		RT ± chemo	anthracycline-based regimens	3	56	65.3799	No	65.3799	no
316	61	>=1.3	male	43	<60	19.8177	>=2	UADT	stage I-II	yes	normal	uninvolved	0-1 site	0-1low risk	0-1 (AGR>=1.3)	1-2 intermediate risk	1-2 intermediate risk	75.47	49	1.84906	1	8.7	5.8	2.1	10.99		RT ± chemo	anthracycline-based regimens	6	60	81.6099	No	27.1047	yes
317	76.06	>=1.3	male	50	<60	27.7769	0-1	UADT	stage I-II	no	normal	involved	0-1 site	0-1low risk	0-1 (AGR>=1.3)	1-2 intermediate risk	1-2 intermediate risk	68.15	49.1	2.58421	1	5.6	3	1.1	2.39		RT ± chemo			60	75.0719	No	75.0719	no
318	53.8	>=1.3	male	27	<60	28.6501	0-1	UADT	stage I-II	yes	normal	uninvolved	0-1 site	0-1low risk	0-1 (AGR>=1.3)	1-2 intermediate risk	1-2 intermediate risk	85.67	49.1	1.34153	1	8.1	4.8	2.5	9.5		RT ± chemo	asparaginase-containing reigmens	3	50	37.4867	No	37.4867	no
319	69.08	>=1.3	male	24	<60	20.3074	0-1	UADT	stage I-II	yes	normal	involved	0-1 site	0-1low risk	0-1 (AGR>=1.3)	1-2 intermediate risk	1-2 intermediate risk	80.35	49.2	1.58199	1	8.2	3.6	3.1	2.38	3	RT ± chemo	anthracycline-based regimens	6	60	14.193	Yes	5.51951	yes
320	56.41	>=1.3	male	25	<60	20.8086	>=2	EUADT	stage I-II	yes	normal	uninvolved	0-1 site	0-1low risk	0-1 (AGR>=1.3)	1-2 intermediate risk	1-2 intermediate risk	75.47	49.2	1.87072	1	4.6	2.9	1.1	1.63		RT ± chemo	anthracycline-based regimens	4	20	18.8255	Yes	12.2875	yes
321	70.3	>=1.3	male	50	<60	23.4586	0-1	UADT	stage I-II	no	normal	uninvolved	0-1 site	0-1low risk	0-1 (AGR>=1.3)	0 low risk	0 low risk	80.88	49.3	1.56013	1	4	1.8	1.5	84		chemo alone	asparaginase-containing reigmens	3		4.79671	Yes	2.56263	yes
322	70.1	>=1.3	male	17	<60	18.7175	0-1	UADT	stage I-II	no	normal	uninvolved	0-1 site	0-1low risk	0-1 (AGR>=1.3)	0 low risk	0 low risk	79.4	49.4	1.64667	1	6.9	3.3	2.9	3.01	27	RT ± chemo	asparaginase-containing reigmens	3	56.7	30.2587	No	30.2587	no
323	75.9	>=1.3	male	34	<60	24.7252	0-1	UADT	stage I-II	no	normal	uninvolved	0-1 site	0-1low risk	0-1 (AGR>=1.3)	0 low risk	0 low risk	79.25	49.4	1.65217	1	5	2.6	2	0.3		RT ± chemo	asparaginase-containing reigmens	2	54.6	30.3573	No	30.3573	no
324	81.5	>=1.3	male	39	<60	20.3074	0-1	UADT	stage I-II	no	normal	uninvolved	0-1 site	0-1low risk	0-1 (AGR>=1.3)	0 low risk	0 low risk	79.4	49.7	1.6734	1	7	4.3	2.1	0.16		RT ± chemo	anthracycline-based regimens	4	46	52.2382	No	52.2382	no
325	81.5	>=1.3	male	39	<60	20.3074	0-1	UADT	stage I-II	no	normal	uninvolved	0-1 site	0-1low risk	0-1 (AGR>=1.3)	0 low risk	0 low risk	79.4	49.7	1.6734	1	7	4.3	2.1	0.16		RT ± chemo	anthracycline-based regimens	4	46	52.2382	No	52.2382	no
326	58.7	>=1.3	female	47	<60	20.9566	0-1	UADT	stage I-II	no	normal	uninvolved	0-1 site	0-1low risk	0-1 (AGR>=1.3)	0 low risk	0 low risk	83.33	49.9	1.49401	1	8.3	5.7	2.2	1.8		chemo alone	asparaginase-containing reigmens	2		8.54209	Yes	8.54209	yes
327	77	>=1.3	female	25	<60	21.5019	0-1	UADT	stage I-II	no	normal	uninvolved	0-1 site	0-1low risk	0-1 (AGR>=1.3)	0 low risk	0 low risk	82.5	49.9	1.53067	1	4.1	2.3	1.4			RT ± chemo	anthracycline-based regimens	3	40	126.226	No	126.226	no
328	79.51	>=1.3	male	34	<60	20.7967	0-1	UADT	stage I-II	no	normal	uninvolved	0-1 site	0-1low risk	0-1 (AGR>=1.3)	0 low risk	0 low risk	79.2	50.7	1.77895	1	6	4.1	1.2	1.39	1	RT ± chemo	anthracycline-based regimens	2	56	46.653	No	46.653	no
329	77	>=1.3	male	34	<60	23.03	0-1	UADT	stage I-II	yes	elevated	involved	0-1 site	0-1low risk	0-1 (AGR>=1.3)	3-4 high risk	3-4 AGR>=1.3	82.6	51.7	1.67314	1	4.8	2.6	1.3		38	RT ± chemo	anthracycline-based regimens	3	54	4.92813	Yes	4.27105	yes
330	109	>=1.3	male	34	<60	28.4005	0-1	UADT	stage I-II	no	normal	uninvolved	0-1 site	0-1low risk	0-1 (AGR>=1.3)	0 low risk	0 low risk	77.9	53	2.12851	1	6.3	3	1.9			RT ± chemo	anthracycline-based regimens	6	50	122.776	No	122.776	no
331	67	>=1.3	male	48	<60	26.7299	0-1	UADT	stage I-II	yes	normal	uninvolved	0-1 site	0-1low risk	0-1 (AGR>=1.3)	0 low risk	0 low risk	83.4	54.4	1.87586	1	6.1	3.8	1.9			RT ± chemo	anthracycline-based regimens	2	54	22.8008	Yes	11.6304	yes
